# Supplementary material for: Room temperature ligand-free Cu2O–H2O2 catalyzed tandem oxidative synthesis of quinazoline-4(3H)-one and quinazoline derivatives
Source: Royal Society of Chemistry journal article supplement (doi:10.1039/d2ob02085h), 2022-12-22
Supplement: d2ob02085h1.pdf [file d2ob02085h1.pdf]

*Supporting Information*

**Room Temperature ligand free Cu<sub>2</sub>O-H<sub>2</sub>O<sub>2</sub> Catalyzed tandem oxidative synthesis of quinazoline-4(3H)-one and quinazoline derivatives**

Nilakshi Dutta<sup>a</sup>, Bidyutjyoti Dutta<sup>a</sup>, Apurba Dutta<sup>b</sup>, Bipul Sarma<sup>c</sup>, Diganta Sarma<sup>a\*</sup>

E-mail: dsarma22@gmail.com

<sup>a</sup>Department of Chemistry, Dibrugarh University, Dibrugarh-786004, Assam, India

<sup>b</sup>Department of Chemistry, DHSK College, Dibrugarh-786001, Assam, India

<sup>c</sup>Department of Chemical Sciences, Tezpur University, Tezpur-784028, Assam, India

**TABLE OF CONTENTS**

| Sl no. |                                                                                           | Page No. |
|--------|-------------------------------------------------------------------------------------------|----------|
| 1      | General Information                                                                       | S2       |
| 2      | General Procedure for the synthesis of 2-arylquinazolin-4(3H)-ones and 2-arylquinazolines | S2-S3    |
| 3      | Single crystal X-ray diffraction                                                          | S3       |
| 4      | Spectral data of the representative products                                              | S4-S9    |
| 5      | Copies of <sup>1</sup> H and <sup>13</sup> C Spectra of the representative products       | S9-S33   |
| 6      | References                                                                                | S34      |

## 1) General information

All reactions were carried out in oven dried glassware under atmospheric conditions otherwise noted. Starting materials and solvents were obtained from common commercial sources and used without further purification. All reported yields are isolated yields. TLC was carried out using aluminium sheets pre-coated with silica gel 60F<sub>254</sub> (Merck) and was visualized under 254 nm UV light. Melting points were obtained by an open capillary method and are uncorrected. <sup>1</sup>H NMR (500 MHz) and <sup>13</sup>C NMR (125 MHz) were recorded on a Bruker Advance 500 MHz spectrometer using TMS as an internal standard. Chemical shifts are reported in parts per million (ppm), downfield from residual solvents peaks and coupling constants are reported as Hertz (Hz). Splitting patterns are designated as s (singlet), d (doublet), t (triplet), q (quartet), dd (doublet of doublet), br (broad) and m (multiplet, for unresolved lines). The mass spectra were recorded on a Q-TOF micromass (YA-105) spectrometer in ESI (electrospray ionization) mode. Single crystal X-ray diffractions were collected on a Bruker SMART APEX-II CCD diffractometer.

## 2) General procedure for synthesis of 2-arylquinazolin-4(3H)-one and 2-phenylquinazoline derivatives

2-aminobenzonitrile (0.5 mmol), benzyl alcohol derivatives (0.6 mmol), Cu<sub>2</sub>O (10 mol %), H<sub>2</sub>O<sub>2</sub> (1.5 mmol), KOH (0.75 mmol), DMSO (2 ml) were subjected under vigorous stirring in a round bottom flask which was maintained at room temperature for 10 hours. For the extension work 2-aminobenzylamine (0.6 mmol), benzaldehyde derivatives (0.5 mmol), Cu<sub>2</sub>O (20 mol %), KOH (0.75 mmol), DMSO (2 ml) were subjected to round bottom flask fitted with a condenser under 60 °C and stirred for 3 hours. The progress of the reaction was monitored by TLC under UV light. After completion of the reaction the mixture was extracted with ethyl acetate (3 x 10 mL) and washed with water (3 x 10 mL). The combined extract was dried over anhydrous Na<sub>2</sub>SO<sub>4</sub>. The

filtrate was concentrated under reduced pressure. The product was purified by column chromatography over silica gel using n-hexane/ethyl acetate (3:1 v/v) as eluent to get the purified product. The products were then characterized by ESI-MS, <sup>1</sup>H NMR, <sup>13</sup>C NMR spectra.

### 3) Single crystal X-ray diffraction

Single crystal X-ray diffractions were collected on a Bruker SMART APEX-II CCD diffractometer using Mo K $\alpha$  ( $\lambda = 0.71073$  Å) radiation.<sup>1</sup> Bruker SAINT software has been employed for reducing the data and SADABS for correcting the intensities of absorption.<sup>2</sup> Structure was solved and refined using SHELXL with anisotropic displacement parameters for non-H atoms. In the crystal structure H-atoms are located experimentally, whereas C–H atoms were fixed geometrically using the HFIX command in SHELX-TL.<sup>3</sup> No missed symmetry observed in the final check of CIF file using PLATON.<sup>4,5</sup> Information of crystallographic parameters for all structures is furnished in **Table S1**.

**Table S1: Crystallographic parameters of structures of multicomponent systems 3a**

| Crystal data                          | Compound 3a                                      |
|---------------------------------------|--------------------------------------------------|
| Formula unit                          | C <sub>15</sub> H <sub>12</sub> N <sub>2</sub> O |
| Formula weight (gmol <sup>-1</sup> )  | 236.27                                           |
| Crystal system                        | Triclinic                                        |
| T [K]                                 | 100                                              |
| <i>a</i> [Å]                          | 4.803(3)                                         |
| <i>b</i> [Å]                          | 15.071(11)                                       |
| <i>c</i> [Å]                          | 17.003(12)                                       |
| $\alpha$ [°]                          | 94.37(2)                                         |
| $\beta$ [°]                           | 93.80(2)                                         |
| $\gamma$ [°]                          | 97.93(2)                                         |
| Volume [Å <sup>3</sup> ]              | 1211.7(15)                                       |
| Space group                           | <i>P</i> -1                                      |
| Z                                     | 4                                                |
| D <sub>cal</sub> [g/cm <sup>3</sup> ] | 1.295                                            |
| Absorption correction                 | SADABS/Multi-scan                                |
| R <sub>1</sub> , wR <sub>2</sub>      | 0.0635, 0.1195                                   |
| Instrument                            | Bruker CCD Apex II                               |
| CCDC No                               | 2213373                                          |

#### 4) Spectral data of products

##### 2-(p-tolyl)quinazolin-4(3H)-one (Table 2;6a1)

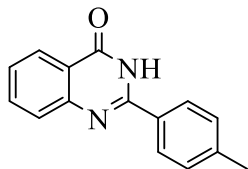

$^1\text{H}$  NMR (500 MHz, DMSO- $d_6$ )  $\delta$  12.42 (s, 1H), 8.11 (d,  $J$  = 6.9 Hz, 1H), 8.06 (d,  $J$  = 8.2 Hz, 2H), 7.78 (t,  $J$  = 7.6 Hz, 1H), 7.68 (d,  $J$  = 8.0 Hz, 1H), 7.46 (t,  $J$  = 7.5 Hz, 1H), 7.30 (d,  $J$  = 8.1 Hz, 2H), 2.34 (s, 3H).  $^{13}\text{C}\{^1\text{H}\}$  NMR (125 MHz, DMSO- $d_6$ )  $\delta$  162.55, 152.50, 149.00, 141.69, 134.79, 130.12, 129.42, 127.92, 126.62, 126.08, 121.12, 21.22. MS (ESI)  $m/z$ :  $[\text{M}+\text{H}]^+$  calcd for  $\text{C}_{15}\text{H}_{12}\text{N}_2\text{O}$  237.09; Found 237.11

##### 2-(2-chlorophenyl)quinazolin-4(3H)-one (Table 2;6a2)

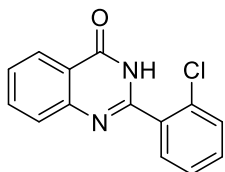

$^1\text{H}$  NMR (500 MHz,  $\text{CDCl}_3$ )  $\delta$  11.80 (s, 1H), 8.30 (d,  $J$  = 8.0 Hz, 1H), 7.80 (d,  $J$  = 8.2 Hz, 1H), 7.75 (d,  $J$  = 8.0 Hz, 1H), 7.50 (t,  $J$  = 7.5 Hz, 1H), 7.41 (d,  $J$  = 9.1 Hz, 2H), 7.38 – 7.34 (m, 1H), 7.27 – 7.23 (m, 1H).  $^{13}\text{C}\{^1\text{H}\}$  NMR (125 MHz,  $\text{CDCl}_3$ )  $\delta$  163.80, 156.49, 148.99, 135.06, 134.56, 133.16, 128.26, 127.30, 126.17, 125.86, 124.59, 120.01. MS (ESI)  $m/z$ :  $[\text{M}+\text{H}]^+$  calcd for  $\text{C}_{14}\text{H}_9\text{ClN}_2\text{O}$  257.06; Found 257.08.

##### 2-(4-chlorophenyl)quinazolin-4(3H)-one (Table 2; 6a3)

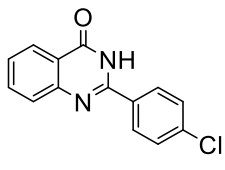

$^1\text{H}$  NMR (500 MHz, DMSO- $d_6$ )  $\delta$  12.66 (s, 1H), 8.25 (d,  $J$  = 8.5 Hz, 1H), 8.21 (d,  $J$  = 7.7 Hz, 1H), 7.90 (t,  $J$  = 7.6 Hz, 1H), 7.80 (d,  $J$  = 8.1 Hz, 2H), 7.68 (d,  $J$  = 8.5 Hz, 2H), 7.59 (t,  $J$  = 7.4 Hz, 1H).  $^{13}\text{C}\{^1\text{H}\}$  NMR (125 MHz, DMSO- $d_6$ )  $\delta$  162.99, 152.15, 149.20, 136.93, 135.33, 132.29, 130.29, 129.35, 126.54, 121.64. MS (ESI)  $m/z$ :  $[\text{M}+\text{H}]^+$  calcd for  $\text{C}_{14}\text{H}_9\text{ClN}_2\text{O}$  257.06; Found 257.09.

##### 2-(4-fluorophenyl)quinazolin-4(3H)-one (Table 2; 6a4)

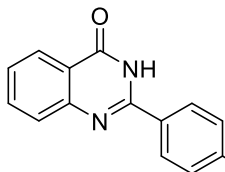

$^1\text{H}$  NMR (500 MHz, DMSO- $d_6$ )  $\delta$  12.70 (s, 1H), 8.38 (d,  $J$  = 14.2 Hz, 2H), 8.28 (d,  $J$  = 7.7 Hz, 1H), 7.96 (t,  $J$  = 7.0 Hz, 1H), 7.86 (d,  $J$  = 8.1 Hz, 1H), 7.65 (t,  $J$  = 7.4 Hz, 1H), 7.52 (t,  $J$  = 8.8 Hz, 2H).  $^{13}\text{C}\{^1\text{H}\}$  NMR (125 MHz, DMSO- $d_6$ )  $\delta$  162.25, 151.40, 148.70, 134.66, 130.44, 127.50, 126.64, 125.89, 120.93, 115.75, 115.57. MS (ESI)  $m/z$ :  $[\text{M}+\text{H}]^+$  calcd for  $\text{C}_{14}\text{H}_9\text{FN}_2\text{O}$  241.06; Found 241.08.

##### 2-(4-methoxyphenyl)quinazolin-4(3H)-one (Table 2; 6a5)

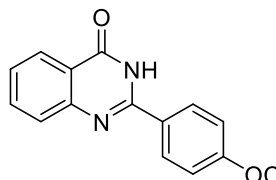

<sup>1</sup>H NMR (500 MHz, DMSO-d<sub>6</sub>) δ 12.34 (s, 1H), 8.13 (d, *J* = 8.9 Hz, 2H), 8.07 (d, *J* = 7.9 Hz, 1H), 7.74 (t, *J* = 6.9 Hz, 1H), 7.64 (d, *J* = 8.0 Hz, 1H), 7.41 (t, *J* = 7.9 Hz, 1H), 7.02 (d, *J* = 8.9 Hz, 2H), 3.78 (s, 3H). <sup>13</sup>C{<sup>1</sup>H} NMR (125 MHz, DMSO-d<sub>6</sub>) δ 162.73, 162.29, 152.27, 149.35, 134.93, 131.75, 129.87, 127.69, 126.52, 126.24, 125.22, 121.10, 114.40, 55.87. MS (ESI) *m/z*: [M+H]<sup>+</sup> calcd for C<sub>15</sub>H<sub>12</sub>N<sub>2</sub>O<sub>2</sub>H 253.08; Found 253.10.

### 2-phenylquinazolin-4(3H)-one (Table 2; 6a6)

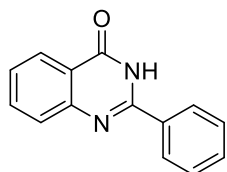

<sup>1</sup>H NMR (500 MHz, DMSO-d<sub>6</sub>) δ 12.66 (s, 1H), 8.30 (d, *J* = 7.0 Hz, 2H), 8.28 (d, *J* = 8.9 Hz, 1H), 7.94 (d, *J* = 6.9 Hz, 1H), 7.86 (d, *J* = 7.9 Hz, 1H), 7.67 (m, 4H). <sup>13</sup>C{<sup>1</sup>H} NMR (125 MHz, DMSO-d<sub>6</sub>) δ 162.68, 152.74, 149.19, 135.02, 133.17, 131.82, 129.04, 128.22, 128.08, 127.01, 126.30, 121.44. MS (ESI) *m/z*: [M+H]<sup>+</sup> calcd for C<sub>14</sub>H<sub>10</sub>N<sub>2</sub>O 223.07; Found 223.08.

### 7-chloro-2-phenylquinazolin-4(3H)-one (Table 2; 6a7)

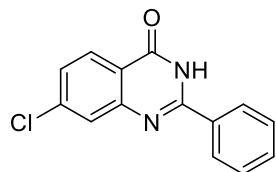

<sup>1</sup>H NMR (500 MHz, DMSO-d<sub>6</sub>) δ 12.55 (s, 1H), 8.08 (m, 3H), 7.70 (s, 1H), 7.66 (d, *J* = 8.1 Hz, 1H), 7.53 – 7.43 (m, 3H). <sup>13</sup>C{<sup>1</sup>H} NMR (125 MHz, DMSO-d<sub>6</sub>) δ 162.35, 154.48, 139.84, 133.07, 132.38, 129.30, 128.59, 127.46, 126.52. MS (ESI) *m/z*: [M+H]<sup>+</sup> calcd for C<sub>14</sub>H<sub>9</sub>ClN<sub>2</sub>O 257.04; Found 257.07.

### 7-chloro-2-(p-tolyl)quinazolin-4(3H)-one (Table 2; 6a9)

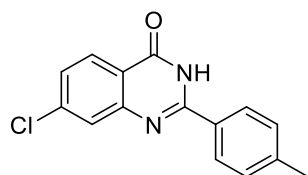

<sup>1</sup>H NMR (500 MHz, DMSO-d<sub>6</sub>) δ 12.69 (s, 1H), 7.93 (d, *J* = 8.1 Hz, 1H), 7.85 (s, 1H), 7.61 (d, *J* = 8.5 Hz, 2H), 7.45 (d, *J* = 8.0 Hz, 1H), 7.38 (d, *J* = 8.0 Hz, 2H), 2.48 (s, 3H). <sup>13</sup>C{<sup>1</sup>H} NMR (125 MHz, DMSO-d<sub>6</sub>) δ 162.16, 154.15, 143.47, 142.33, 129.93, 128.31, 126.94, 123.62, 123.18, 21.59. MS (ESI) *m/z*: [M+H]<sup>+</sup> calcd for C<sub>15</sub>H<sub>11</sub>ClN<sub>2</sub>O 271.05; Found 271.08.

### 7-chloro-2-(4-chlorophenyl)quinazolin-4(3H)-one (Table 2; 6a10)

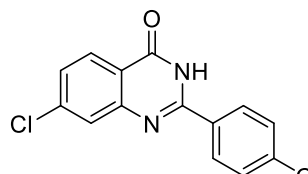

<sup>1</sup>H NMR (500 MHz, DMSO) δ 10.88 (s, 1H), 9.09 (d, *J* = 20.9 Hz, 1H), 8.34 (s, 1H), 8.20 (d, *J* = 8.5 Hz, 1H), 7.35 (m, 4H). <sup>13</sup>C{<sup>1</sup>H} NMR (125 MHz, DMSO-d<sub>6</sub>) δ 141.76, 131.27, 128.98, 128.64, 128.36, 128.17, 115.78, 114.77. MS (ESI) *m/z*: [M+H]<sup>+</sup> calcd for C<sub>14</sub>H<sub>8</sub>Cl<sub>2</sub>N<sub>2</sub>O 291.00; Found 291.03.

### 2-(3-methoxyphenyl)quinazolin-4(3H)-one (Table 2; 6a11)

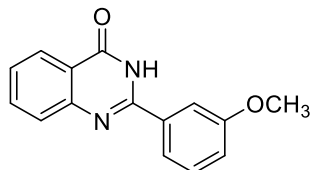

$^1\text{H}$  NMR (500 MHz, DMSO- $d_6$ )  $\delta$  12.48 (s, 1H), 8.10 (d,  $J$  = 7.6 Hz, 2H), 7.82 – 7.75 (m, 1H), 7.74 (d,  $J$  = 7.5 Hz, 1H), 7.69 (s, 1H), 7.46 (t,  $J$  = 7.3 Hz, 1H), 7.40 (t,  $J$  = 7.8 Hz, 1H), 7.09 (d,  $J$  = 7.5 Hz, 1H), 3.81 (s, 3H).  $^{13}\text{C}\{^1\text{H}\}$  NMR (125 MHz, DMSO- $d_6$ )  $\delta$  172.18, 169.30, 161.99, 158.60, 144.53, 143.97, 139.67, 137.48, 136.55, 135.79, 130.97, 130.07, 127.53, 122.49, 65.33. MS (ESI)  $m/z$ :  $[\text{M}+\text{H}]^+$  calcd for  $\text{C}_{15}\text{H}_{12}\text{N}_2\text{O}_2\text{H}$  253.08; Found 253.10.

### 2-(2-bromophenyl)quinazolin-4(3H)-one (Table 2; 6a12)

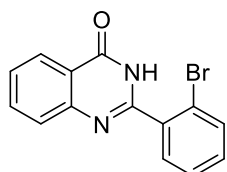

$^1\text{H}$  NMR (500 MHz, DMSO- $d_6$ )  $\delta$  12.62 (s, 1H), 8.28 (d,  $J$  = 7.2 Hz, 1H), 7.93 (t,  $J$  = 7.5 Hz, 1H), 7.84 (d,  $J$  = 8.1 Hz, 2H), 7.69 (d,  $J$  = 7.1 Hz, 1H), 7.67 – 7.63 (m, 2H), 7.63 – 7.59 (m, 1H).  $^{13}\text{C}\{^1\text{H}\}$  NMR (125 MHz, DMSO- $d_6$ )  $\delta$  162.77, 152.85, 149.30, 135.15, 133.27, 131.93, 129.14, 128.31, 128.06, 127.13, 126.40, 121.54. MS (ESI)  $m/z$ :  $[\text{M}+\text{H}]^+$  calcd for  $\text{C}_{14}\text{H}_9\text{BrN}_2\text{O}_2\text{H}$  299.98; Found 300.00.

### (E)-2-styrylquinazolin-4(3H)-one (Table 2; 6a13)

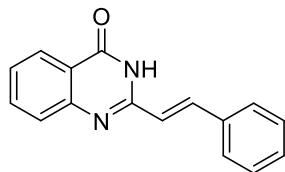

$^1\text{H}$  NMR (500 MHz,  $\text{CDCl}_3$ )  $\delta$  8.14 (d,  $J$  = 7.1 Hz, 1H), 7.83 (d,  $J$  = 16.0 Hz, 1H), 7.61 – 7.57 (m, 2H), 7.51 (d,  $J$  = 7.9 Hz, 2H), 7.45 – 7.42 (m, 1H), 7.35 – 7.31 (m, 2H), 7.27 – 7.22 (m, 1H), 6.49 (d,  $J$  = 16.0 Hz, 1H). MS (ESI)  $m/z$ :  $[\text{M}+\text{H}]^+$  calcd for  $\text{C}_{16}\text{H}_{12}\text{N}_2\text{O}_2\text{H}$  248.09; Found 248.10.

### 2-(3-fluorophenyl)quinazolin-4(3H)-one (Table 2; 6a15)

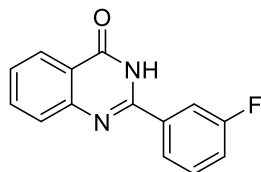

$^1\text{H}$  NMR (500 MHz, DMSO- $d_6$ )  $\delta$  12.65 (s, 1H), 8.06 (d,  $J$  = 10.3 Hz, 1H), 7.90 (t,  $J$  = 7.0 Hz, 1H), 7.80 (s, 1H), 7.66 (dd,  $J$  = 14.1, 8.0 Hz, 2H), 7.60 (t,  $J$  = 7.5 Hz, 1H), 7.50 (td,  $J$  = 8.4, 2.2 Hz, 2H).  $^{13}\text{C}\{^1\text{H}\}$  NMR (125 MHz, DMSO- $d_6$ )  $\delta$  162.43, 161.43, 151.30, 148.78, 135.00, 131.05, 127.93, 127.22, 126.19, 124.23, 118.65. MS (ESI)  $m/z$ :  $[\text{M}+\text{H}]^+$  calcd for  $\text{C}_{14}\text{H}_9\text{FN}_2\text{O}_2\text{H}$  241.06; Found 241.09.

### 7-chloro-2-(4-methoxyphenyl)quinazolin-4(3H)-one (Table 2; 6a16)

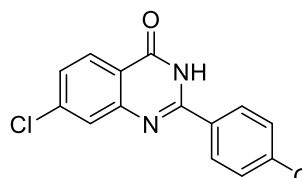

$^1\text{H NMR}$  (500 MHz, DMSO- $d_6$ )  $\delta$  12.70 (s, 1H), 8.23 (d,  $J = 8.5$  Hz, 1H), 7.55 (s, 1H), 7.25 (d,  $J = 7.8$  Hz, 1H), 6.97 (d,  $J = 9.0$  Hz, 2H), 6.87 (d,  $J = 7.7$  Hz, 2H), 3.96 (s, 3H).  $^{13}\text{C}\{^1\text{H}\}$  NMR (125 MHz, DMSO- $d_6$ )  $\delta$  159.36, 153.57, 139.24, 129.82, 129.13, 127.99, 126.87, 126.68, 120.33, 118.55, 112.78, 55.46. MS (ESI)  $m/z$ :  $[\text{M}+\text{H}]^+$  calcd for  $\text{C}_{15}\text{H}_{11}\text{ClN}_2\text{O}_2\text{H}$  287.05; Found 287.07.

### 2-(2-bromophenyl)-7-chloroquinazolin-4(3H)-one (Table 2; 6a17)

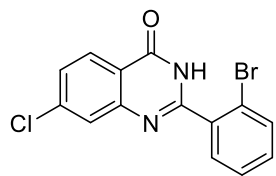

$^1\text{H NMR}$  (500 MHz, DMSO- $d_6$ )  $\delta$  12.62 (s, 1H), 8.12 (d,  $J = 7.3$  Hz, 1H), 8.09 (d,  $J = 8.4$  Hz, 1H), 7.85 (s, 1H), 7.73 (d,  $J = 1.5$  Hz, 1H), 7.55 (d,  $J = 7.1$  Hz, 1H), 7.53 – 7.49 (m, 1H), 7.41 (t,  $J = 7.7$  Hz, 1H).  $^{13}\text{C}\{^1\text{H}\}$  NMR (125 MHz, DMSO- $d_6$ )  $\delta$  162.13, 154.24, 150.36, 139.65, 132.85, 132.18, 129.11, 128.39, 127.26, 127.06, 120.30, 119.42, 118.38. MS (ESI)  $m/z$ :  $[\text{M}+\text{H}]^+$  calcd for  $\text{C}_{14}\text{H}_8\text{BrClN}_2\text{O}_2\text{H}$  333.95; Found 334.02

### 7-chloro-2-(4-fluorophenyl)quinazolin-4(3H)-one (Table 2; 6a18)

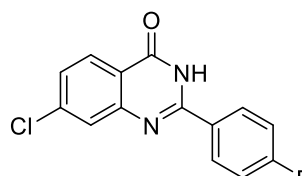

$^1\text{H NMR}$  (500 MHz, DMSO)  $\delta$  12.73 (s, 1H), 9.07 (d,  $J = 21.6$  Hz, 2H), 8.53 (s, 1H), 8.22 (d,  $J = 8.1$  Hz, 1H), 7.78 (d,  $J = 17.0$  Hz, 1H), 7.25 (d,  $J = 16.0$  Hz, 2H).  $^{13}\text{C}\{^1\text{H}\}$  NMR (125 MHz, DMSO- $d_6$ )  $\delta$  162.41, 162.01, 139.02, 130.97, 130.21, 128.69, 128.26, 127.65, 115.08. MS (ESI)  $m/z$ :  $[\text{M}+\text{H}]^+$  calcd for  $\text{C}_{14}\text{H}_8\text{ClFN}_2\text{O}_2\text{H}$  275.03; Found 275.05.

### 7-chloro-2-(2,4-dichlorophenyl)quinazolin-4(3H)-one (Table 2; 6a19)

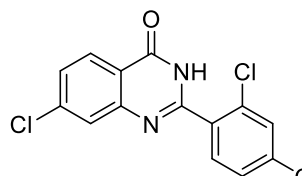

$^1\text{H NMR}$  (500 MHz, DMSO- $d_6$ )  $\delta$  12.85 (s, 1H), 8.34 (s, 1H), 8.20 (d,  $J = 8.6$  Hz, 1H), 8.16 (s, 1H), 7.86 (d,  $J = 1.8$  Hz, 1H), 7.83 (d,  $J = 1.9$  Hz, 1H), 7.74 (d,  $J = 8.3$  Hz, 1H).  $^{13}\text{C}\{^1\text{H}\}$  NMR (125 MHz, DMSO- $d_6$ )  $\delta$  173.34, 161.10, 153.13, 139.56, 132.95, 132.49, 129.48, 128.24, 127.81, 126.95, 120.41. MS (ESI)  $m/z$ :  $[\text{M}+\text{H}]^+$  calcd for  $\text{C}_{14}\text{H}_7\text{Cl}_3\text{N}_2\text{O}_2\text{H}$  323.96; Found 324.00.

### 2-(2,4-dichlorophenyl)quinazolin-4(3H)-one (Table 2; 6a20)

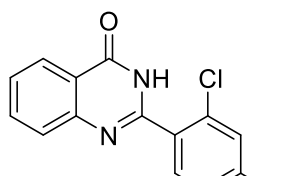

$^1\text{H NMR}$  (500 MHz, DMSO- $d_6$ )  $\delta$  12.82 (s, 1H), 8.34 (d,  $J = 7.7$  Hz, 1H), 8.02 (t,  $J = 7.2$  Hz, 1H), 7.98 (s, 1H), 7.87 (d,  $J = 8.3$  Hz, 2H), 7.77 (d,  $J = 1.8$  Hz, 1H), 7.76 – 7.72 (m, 1H).  $^{13}\text{C}\{^1\text{H}\}$  NMR (125

MHz, DMSO-d<sub>6</sub>)  $\delta$  161.65, 151.64, 148.75, 135.71, 134.93, 132.99, 132.52, 129.44, 127.77, 127.50, 126.13, 121.56. MS (ESI) m/z: [M+H]<sup>+</sup> calcd for C<sub>14</sub>H<sub>8</sub>Cl<sub>2</sub>N<sub>2</sub>OH 290.00; Found 290.10.

### 2-octylquinazolin-4(3H)-one (Table 2; 6a22)

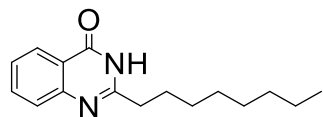

<sup>1</sup>H NMR (500 MHz, CDCl<sub>3</sub>)  $\delta$  11.87 (s, 1H), 8.21 (d, *J* = 7.7 Hz, 1H), 7.78 – 7.58 (m, 2H), 7.39 (t, *J* = 7.2 Hz, 1H), 2.81 – 2.65 (m, 2H), 1.88 – 1.72 (m, 2H), 1.52 – 1.03 (m, 10H), 0.80 (t, *J* = 3.8 Hz, 3H). <sup>13</sup>C{<sup>1</sup>H} NMR (125 MHz, CDCl<sub>3</sub>)  $\delta$  163.99, 156.74, 149.05, 134.48, 126.81, 125.96, 120.18, 35.60, 31.32, 29.36, 28.60, 27.25, 22.27, 13.71. MS (ESI) m/z: [M+H]<sup>+</sup> calcd for C<sub>16</sub>H<sub>22</sub>N<sub>2</sub>O 258.17; Found 258.16.

### 2-(p-tolyl)quinazoline (12a1)

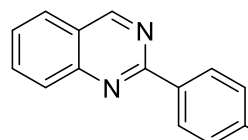

<sup>1</sup>H NMR (400 MHz, CDCl<sub>3</sub>)  $\delta$  9.44 (s, 1H), 8.49 (d, *J* = 8.3 Hz, 2H), 8.06 (d, *J* = 7.6 Hz, 1H), 7.94 – 7.84 (m, 2H), 7.59 (ddd, *J* = 8.1, 7.0, 1.1 Hz, 1H), 7.33 (d, *J* = 8.0 Hz, 2H), 2.44 (s, 3H). <sup>13</sup>C{<sup>1</sup>H} NMR (100 MHz, CDCl<sub>3</sub>)  $\delta$  160.92, 141.00, 134.19, 129.54, 128.64, 127.21, 123.62, 21.63. MS (ESI) m/z: [M+H]<sup>+</sup> calcd for C<sub>15</sub>H<sub>12</sub>N<sub>2</sub> 220.10; Found 220.09.

### 2-phenylquinazoline (Table 6; 12a2)

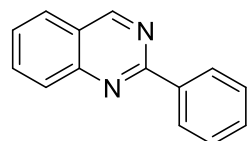

<sup>1</sup>H NMR (400 MHz, CDCl<sub>3</sub>)  $\delta$  9.47 (s, 1H), 8.60 (d, *J* = 6.3 Hz, 2H), 8.09 (d, *J* = 9.1 Hz, 1H), 7.96 – 7.90 (m, 1H), 7.89 (d, *J* = 1.4 Hz, 1H), 7.61 (t, *J* = 7.0 Hz, 1H), 7.52 (t, *J* = 7.1 Hz, 3H). <sup>13</sup>C{<sup>1</sup>H} NMR (100 MHz, CHLOROFORM-D)  $\delta$  161.16, 160.64, 134.27, 130.72, 128.70, 127.33, 125.10, 123.69. MS (ESI) m/z: [M+H]<sup>+</sup> calcd for C<sub>14</sub>H<sub>10</sub>N<sub>2</sub> 206.08; Found 206.10.

### 4-(quinazolin-2-yl)benzotrile (Table 6; 12a3)

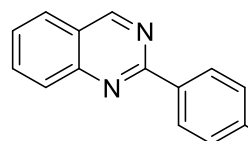

<sup>1</sup>H NMR (500 MHz, CDCl<sub>3</sub>)  $\delta$  9.48 (s, 1H), 8.65 (d, *J* = 3.3 Hz, 1H), 8.52 (d, *J* = 9.3 Hz, 2H), 8.10 (d, *J* = 9.0 Hz, 1H), 7.97 – 7.95 (m, 1H), 7.93 (d, *J* = 7.1 Hz, 2H), 7.65 (t, *J* = 6.9 Hz, 1H). MS (ESI) m/z: [M+H]<sup>+</sup> calcd for C<sub>15</sub>H<sub>9</sub>N<sub>3</sub> 231.08; Found 231.09.

### 2-(4-fluorophenyl)quinazoline (Table 6; 12a4)

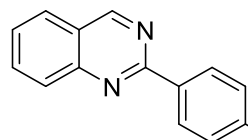

<sup>1</sup>H NMR (500 MHz, CDCl<sub>3</sub>)  $\delta$  7.72 (s, 1H), 7.55 (d, *J* = 3.3 Hz, 1H), 7.42 (d, *J* = 3.7 Hz, 1H), 7.40 (d, *J* = 3.6 Hz, 2H), 7.37 – 7.32 (m, 1H), 6.78 – 6.76 (m, 1H), 6.75 (d, *J* = 3.7 Hz, 2H). <sup>13</sup>C{<sup>1</sup>H} NMR (125 MHz, CDCl<sub>3</sub>)  $\delta$  149.58, 135.22, 134.02, 132.39, 130.91, 128.81, 125.04, 118.03, 117.61, 115.14, 96.08. MS (ESI) m/z: [M+H]<sup>+</sup> calcd for C<sub>14</sub>H<sub>9</sub>FN<sub>2</sub> 224.07; Found 224.08.



## 2-(thiophen-2-yl)quinazoline (Table 6; 12a7)

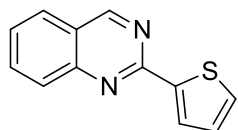

$^1\text{H}$  NMR (500 MHz,  $\text{CDCl}_3$ )  $\delta$  9.37 (s, 1H), 8.19 (d,  $J = 3.1$  Hz, 1H), 8.04 (d,  $J = 8.7$  Hz, 1H), 7.93 – 7.86 (m, 2H), 7.59 (t,  $J = 7.3$  Hz, 1H), 7.55 (d,  $J = 4.4$  Hz, 1H), 7.25 – 7.19 (m, 1H).  $^{13}\text{C}\{^1\text{H}\}$  NMR (126 MHz,  $\text{CDCl}_3$ )  $\delta$  160.54, 157.83, 150.59, 143.81, 134.37, 129.97, 129.26, 128.39, 128.16, 127.27, 127.00, 123.35. MS (ESI)  $m/z$ :  $[\text{M}+\text{H}]^+$  calcd for  $\text{C}_{12}\text{H}_8\text{N}_2\text{S}$  212.04; Found 212.09.

## 2-(4-Bromophenyl)quinazoline (Table 6; 12a8)

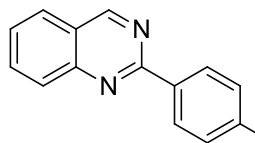

$^1\text{H}$  NMR (500 MHz,  $\text{CDCl}_3$ )  $\delta$  9.48 (s, 1H), 8.54 (d,  $J = 8.3$  Hz, 1H), 8.11 (d,  $J = 8.4$  Hz, 1H), 7.95 (t,  $J = 8.9$  Hz, 2H), 7.67 (dd,  $J = 18.7, 7.9$  Hz, 4H).  $^{13}\text{C}\{^1\text{H}\}$  NMR (126 MHz,  $\text{CDCl}_3$ )  $\delta$  160.51, 160.10, 150.68, 136.93, 134.27, 131.78, 130.16, 128.59, 127.48, 127.14, 125.42, 123.65. (ESI)  $m/z$ :  $[\text{M}+\text{H}]^+$  calcd for  $\text{C}_{14}\text{H}_9\text{BrN}_2$  283.99; Found 283.89.

## 5) Copies of $^1\text{H}$ NMR and $^{13}\text{C}\{^1\text{H}\}$ NMR of the products

### $^1\text{H}$ spectrum of 2-(p-tolyl)quinazolin-4(3H)-one (6a1) (DMSO- $d_6$ , 500 MHz)

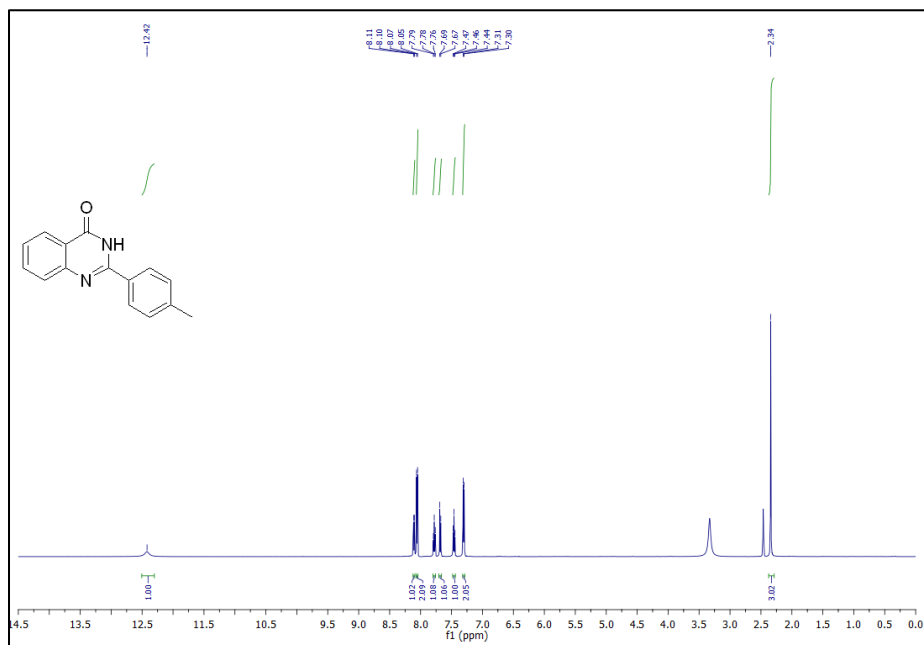

**$^{13}\text{C}\{^1\text{H}\}$  spectrum of 2-(p-tolyl)quinazolin-4(3H)-one (6a1) (DMSO-d6, 125 MHz)**

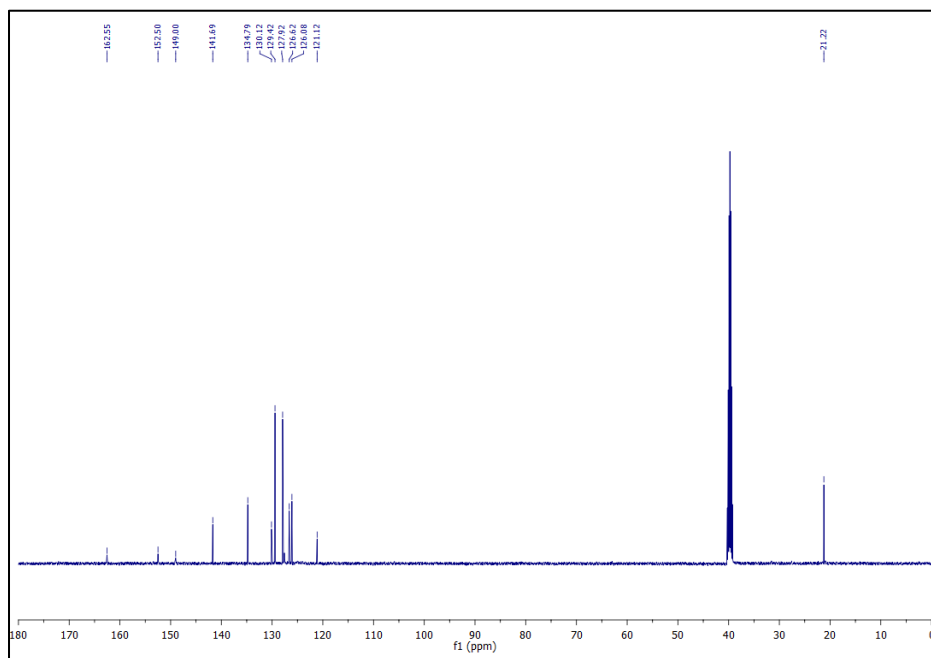

**$^1\text{H}$  spectrum of 2-(2-chlorophenyl)quinazolin-4(3H)-one (6a2) ( $\text{CDCl}_3$ , 500 MHz)**

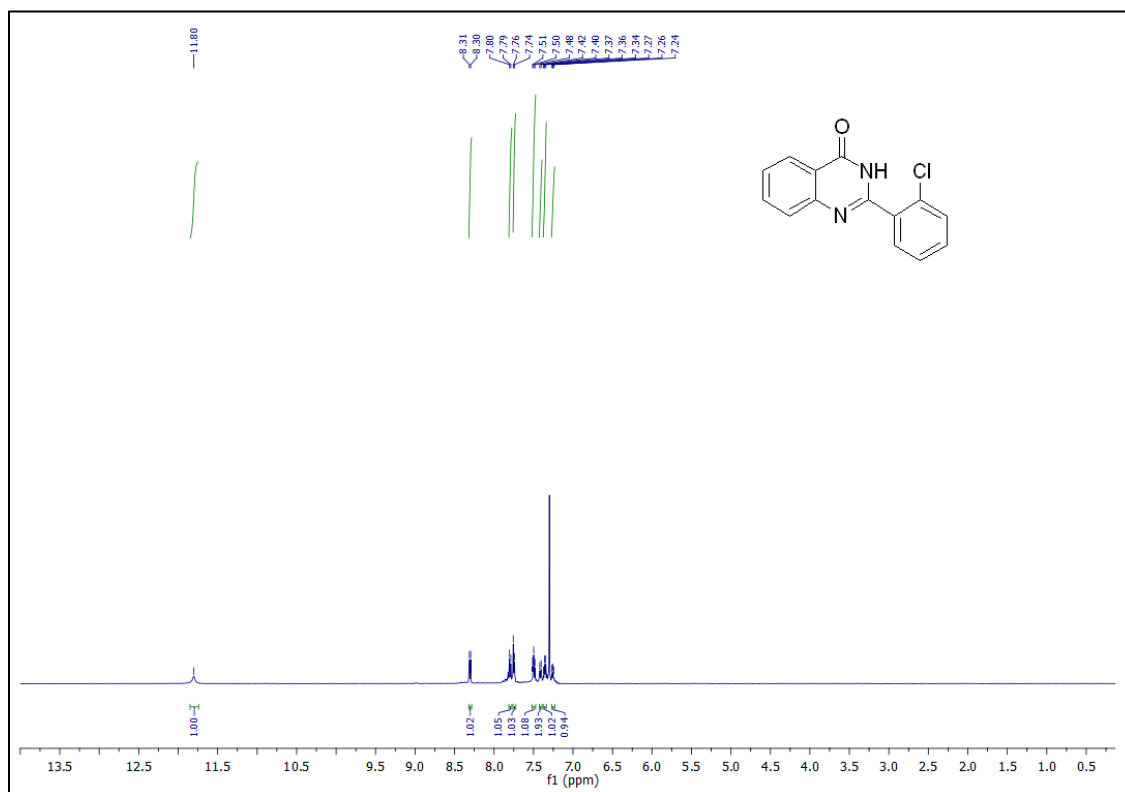

**$^{13}\text{C}\{^1\text{H}\}$  spectrum of 2-(2-chlorophenyl)quinazolin-4(3H)-one (6a2) ( $\text{CDCl}_3$ , 125 MHz)**

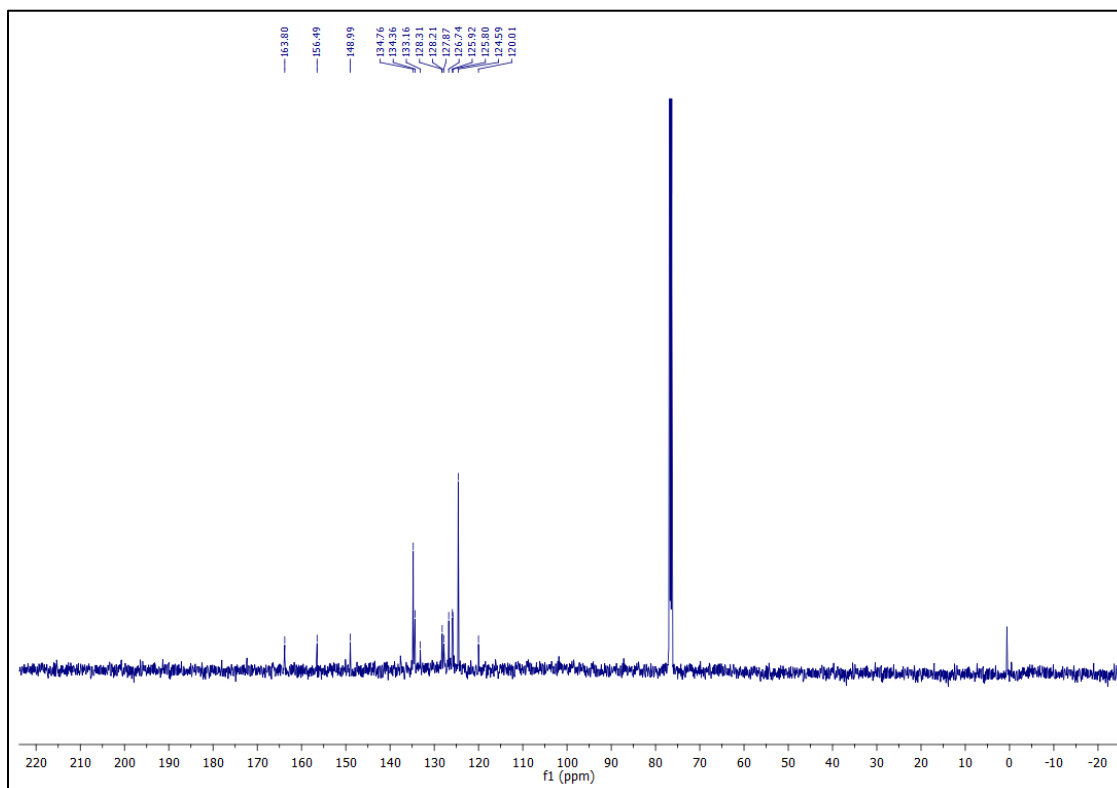

**$^1\text{H}$  spectrum 2-(4-chlorophenyl)quinazolin-4(3H)-one (6a3) ( $\text{DMSO-d}_6$ , 500 MHz)**

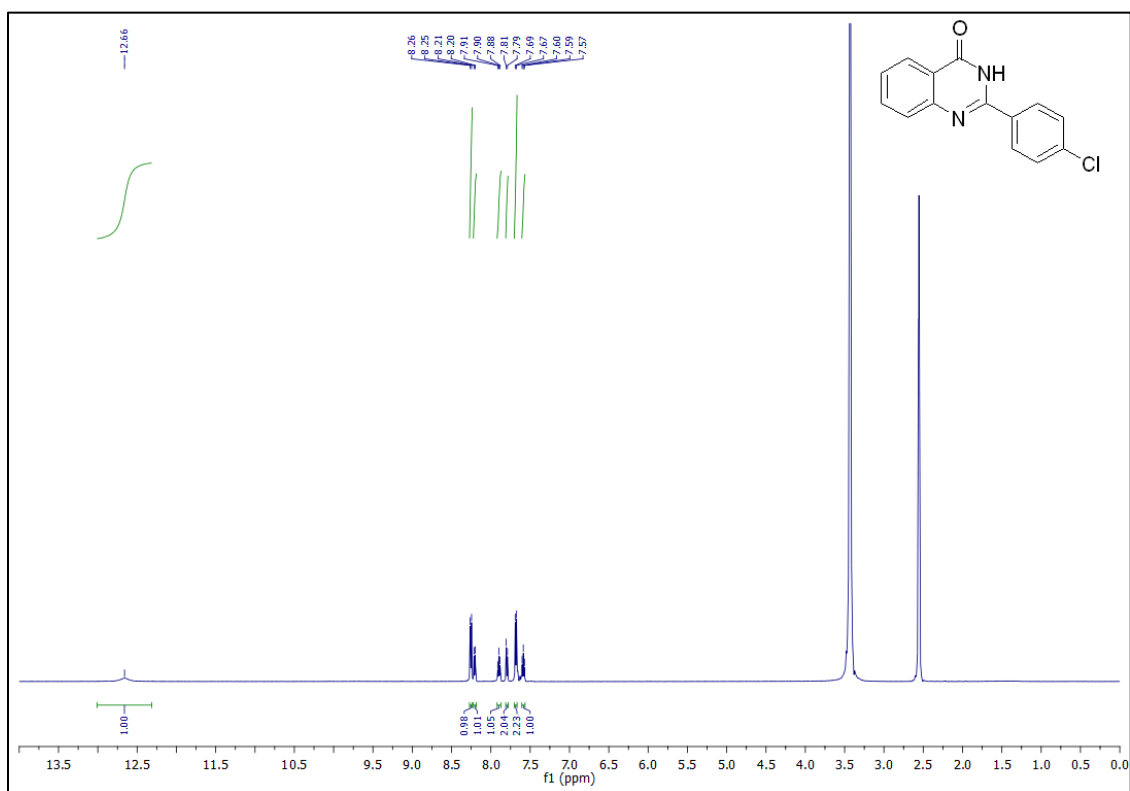

$^{13}\text{C}\{^1\text{H}\}$  spectrum 2-(4-chlorophenyl) quinazolin-4(3H)-one (6a3) (DMSO-d<sub>6</sub>, 125 MHz)

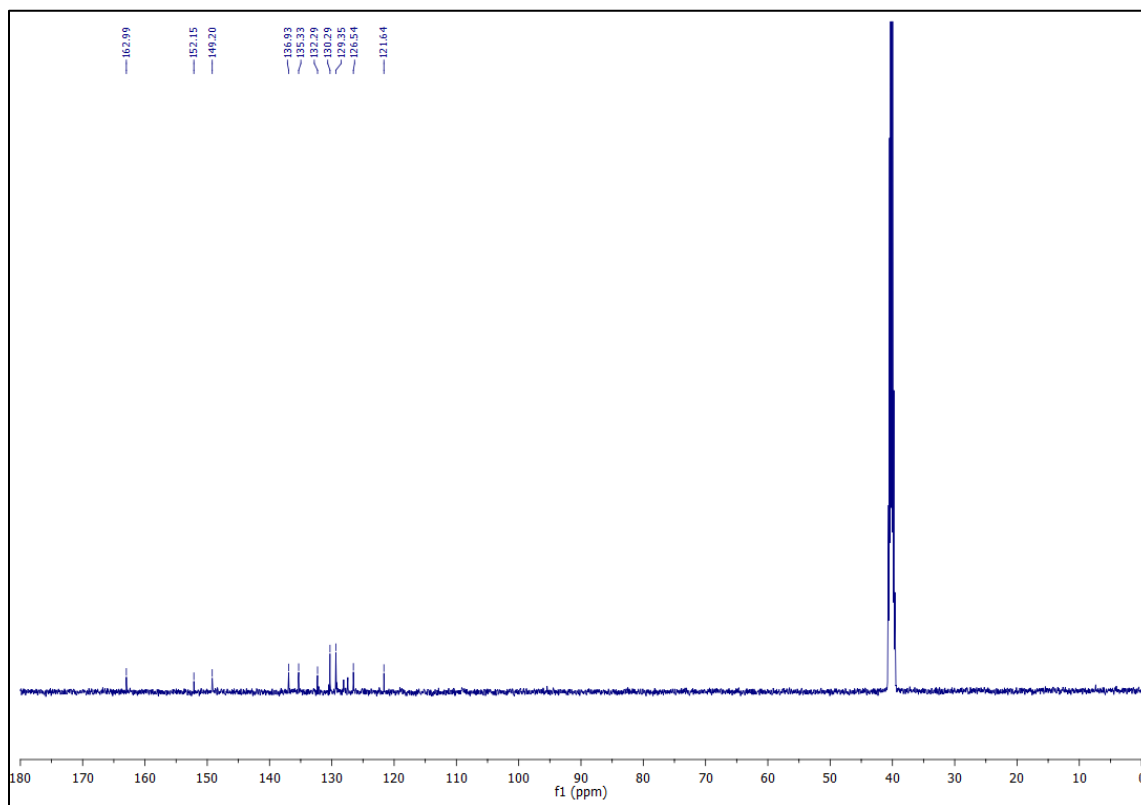

$^1\text{H}$  spectrum 2-(4-fluorophenyl)quinazolin-4(3H)-one (6a4) (DMSO-d<sub>6</sub>, 500 MHz)

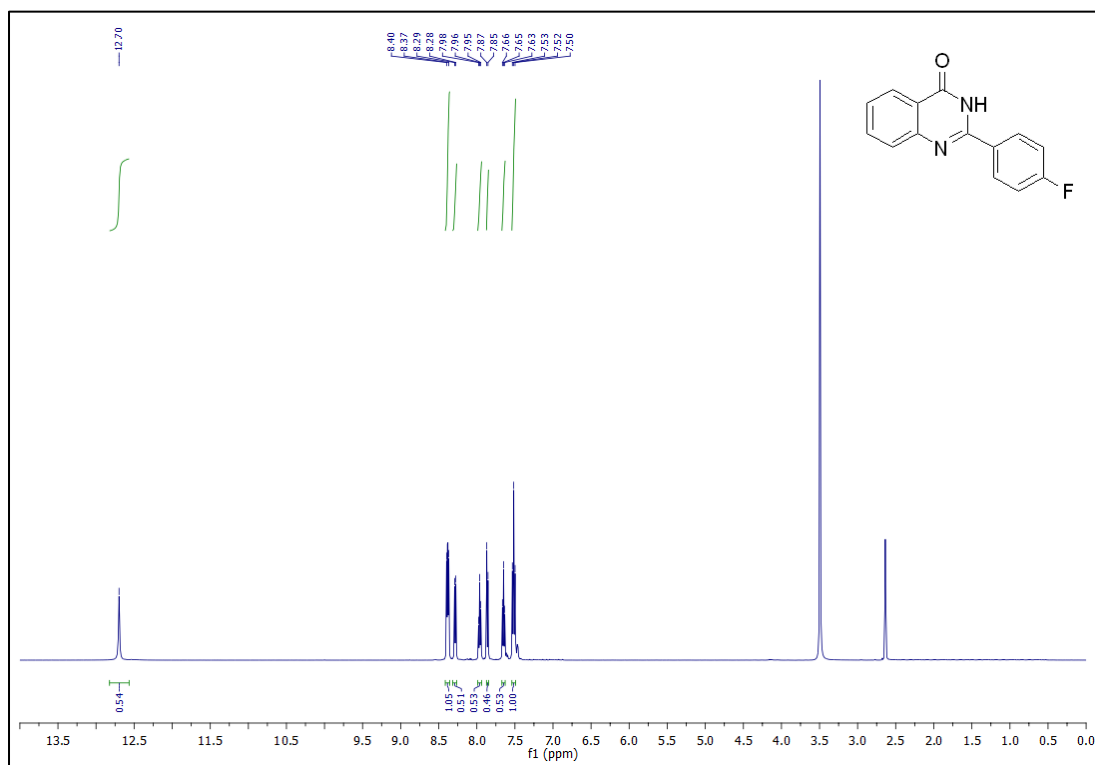

**$^{13}\text{C}\{^1\text{H}\}$  spectrum 2-(4-fluorophenyl)quinazolin-4(3H)-one (6a4) (DMSO- $d_6$ , 125 MHz)**

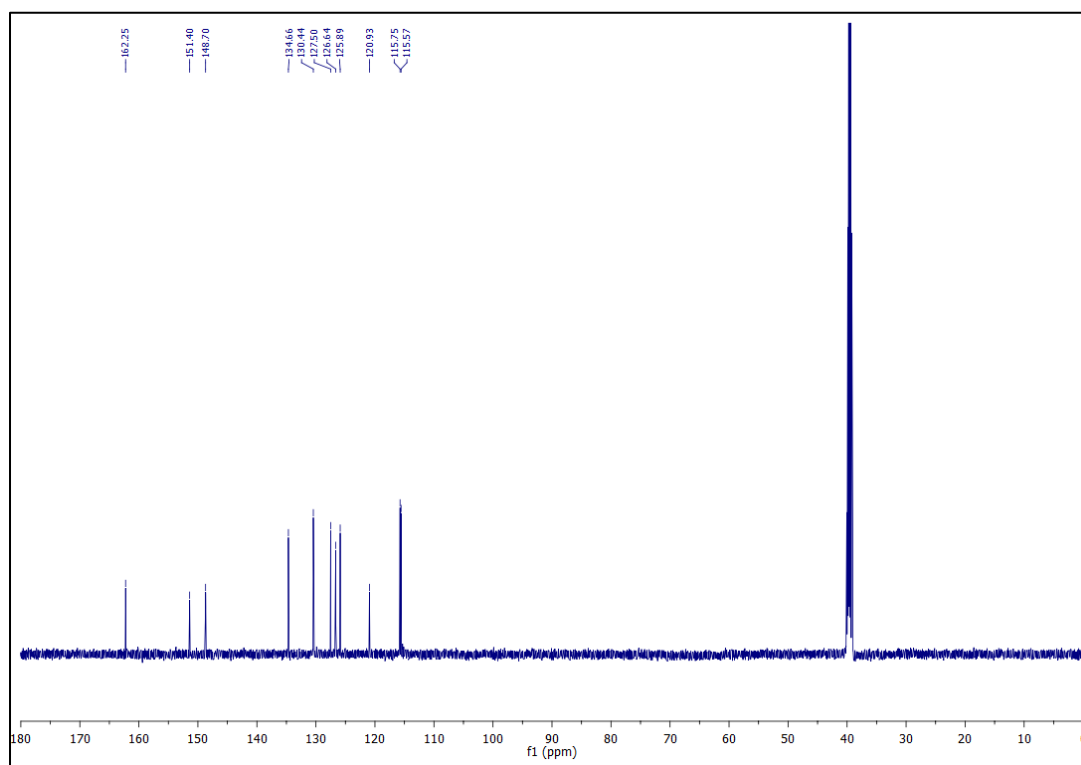

**$^1\text{H}$  spectrum 2-(4-methoxyphenyl)quinazolin-4(3H)-one(6a5) (DMSO- $d_6$ , 500 MHz)**

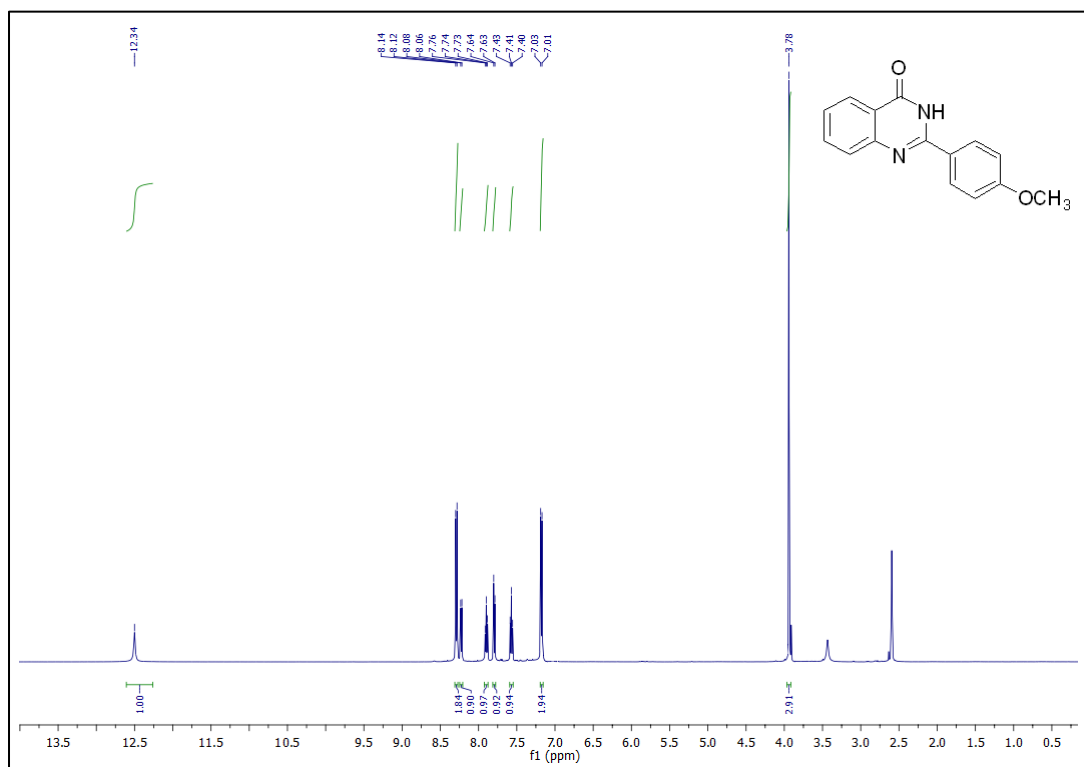

$^{13}\text{C}\{^1\text{H}\}$  spectrum 2-(4-methoxyphenyl)quinazolin-4(3H)-one(6a5) (DMSO-d6, 125 MHz)

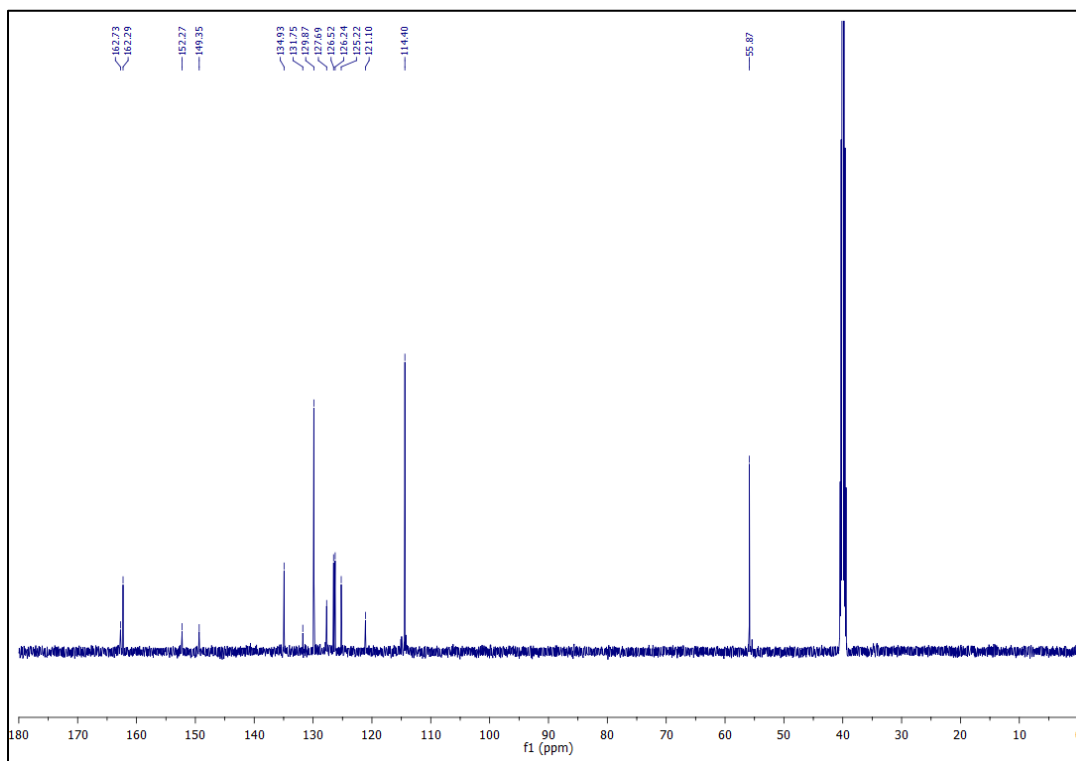

$^1\text{H}$  spectrum 2-phenylquinazolin-4(3H)-one (6a6) (DMSO-d6, 500 MHz)

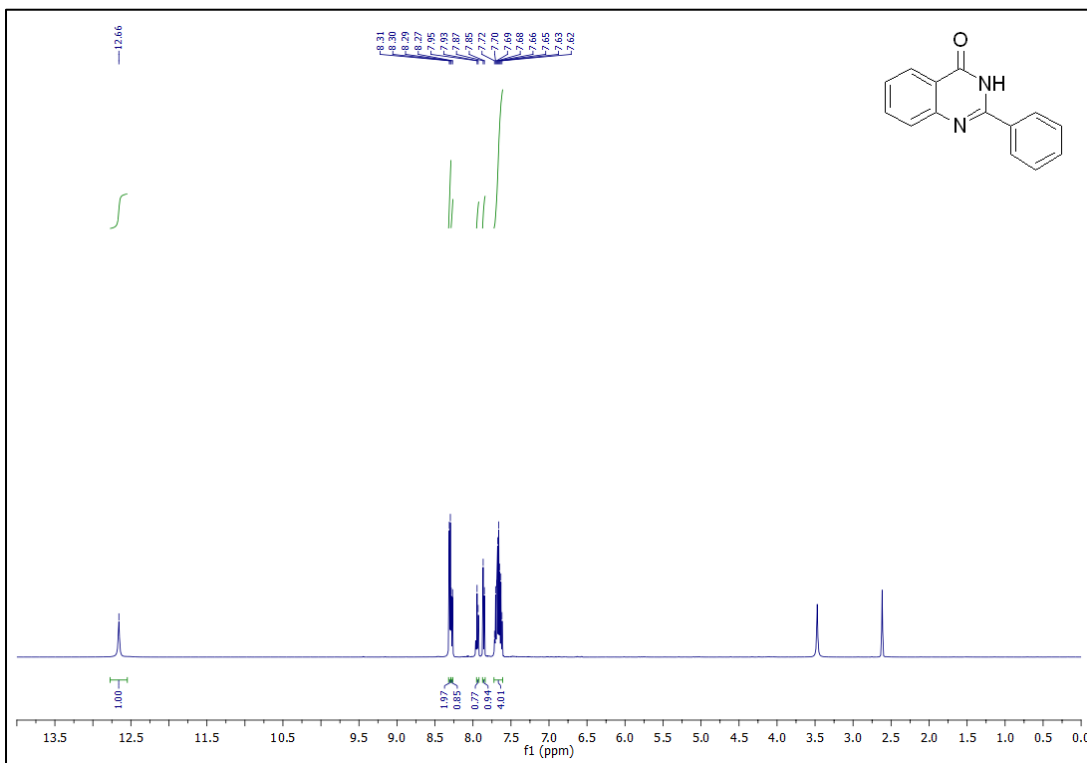

$^{13}\text{C}\{^1\text{H}\}$  spectrum 2-phenylquinazolin-4(3H)-one (6a6) (DMSO-d<sub>6</sub>, 125 MHz)

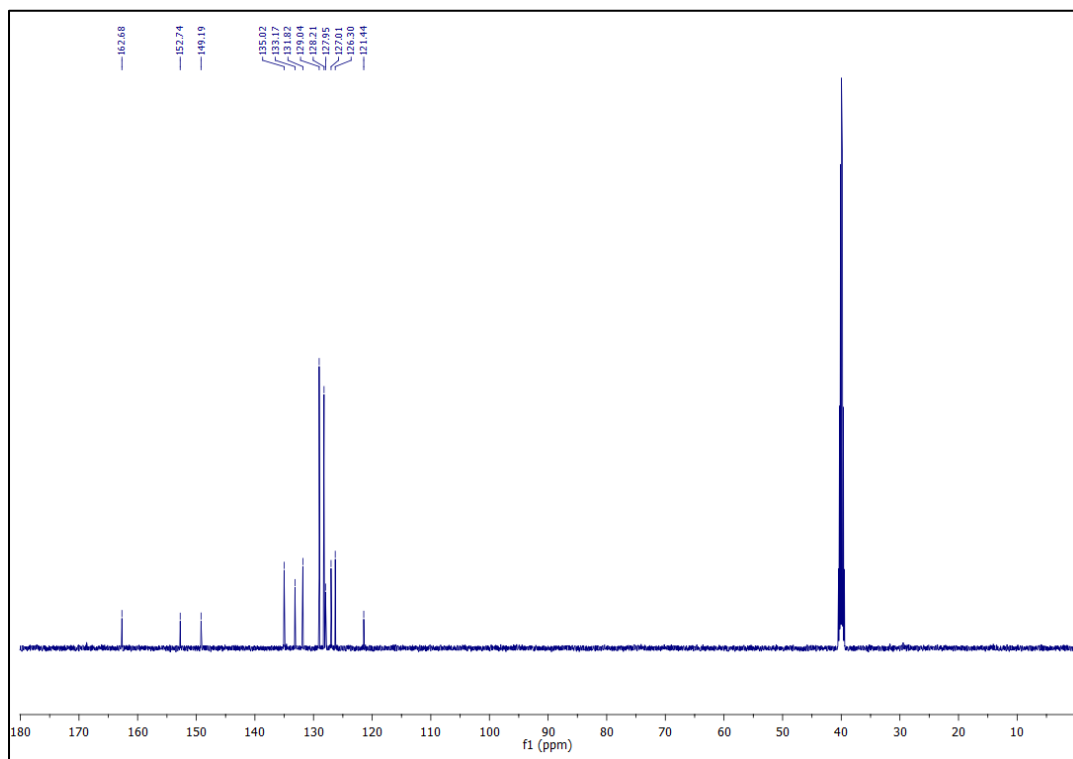

$^1\text{H}$  spectrum 7-chloro-2-phenylquinazolin-4(3H)-one (6a7) (DMSO-d<sub>6</sub>, 500 MHz)

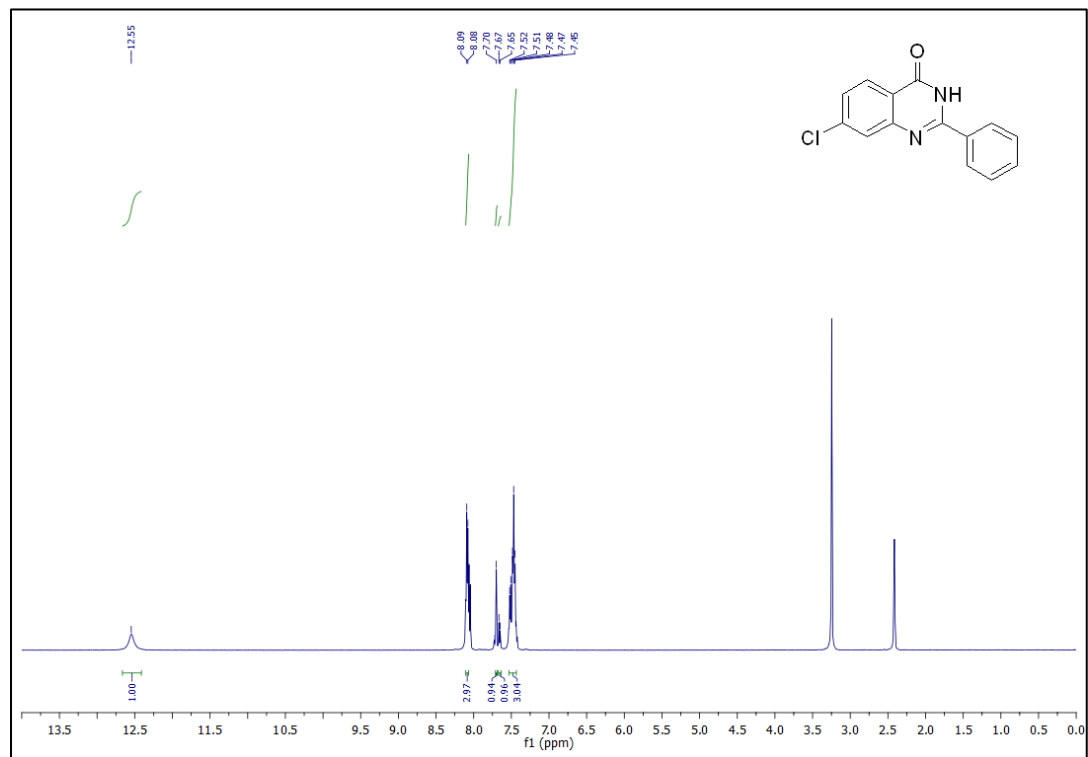

**$^{13}\text{C}\{^1\text{H}\}$  spectrum 7-chloro-2-phenylquinazolin-4(3H)-one (6a7) (DMSO-d<sub>6</sub>, 125 MHz)**

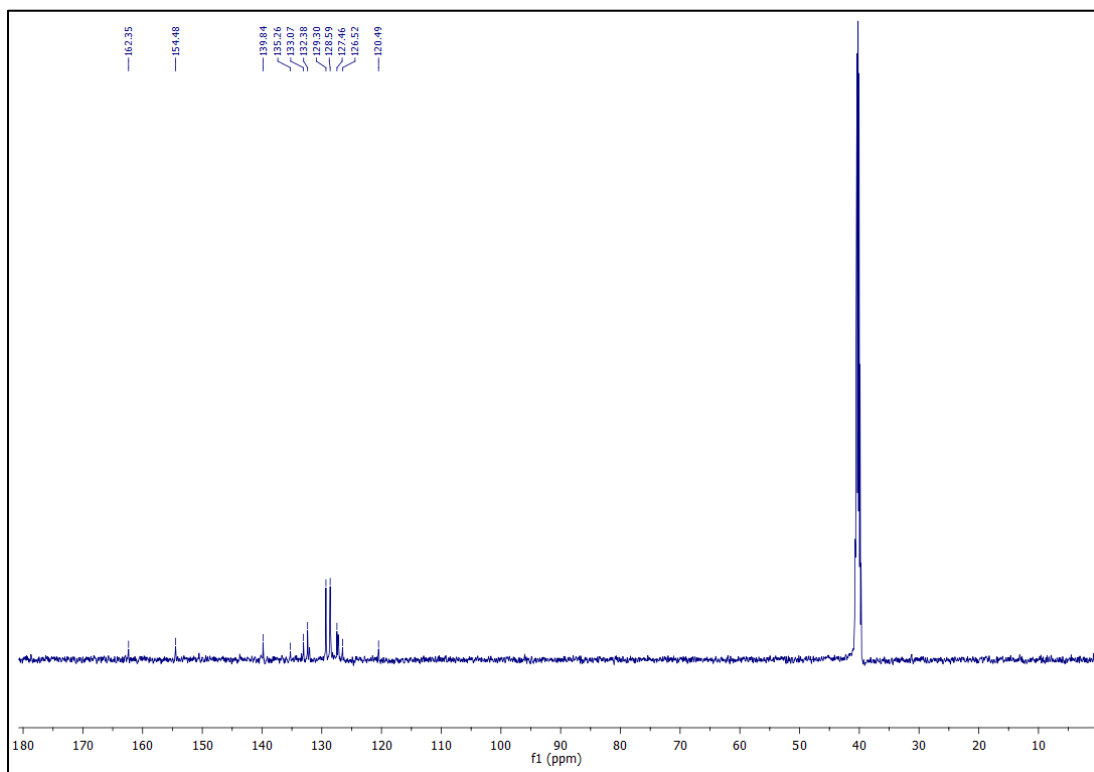

**$^1\text{H}$  spectrum 7-chloro-2-(p-tolyl)quinazolin-4(3H)-one(6a9) (DMSO-d<sub>6</sub>, 500 MHz)**

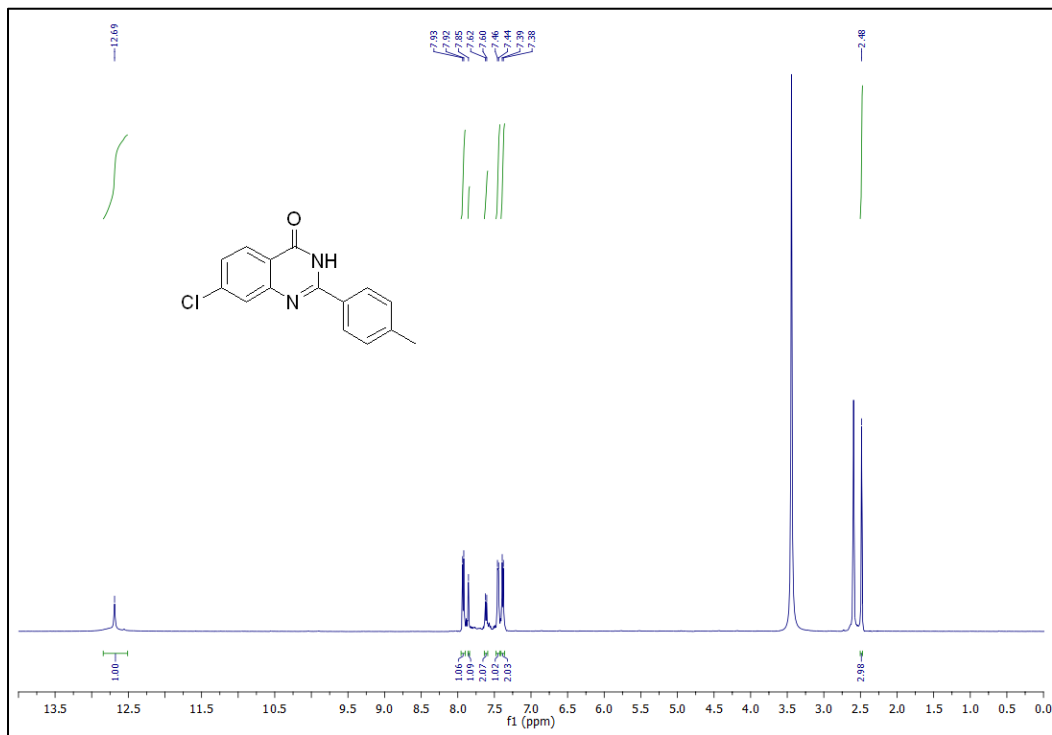



$^{13}\text{C}\{^1\text{H}\}$  spectrum 7-chloro-2-(p-tolyl)quinazolin-4(3H)-one(6a9) (DMSO-d6, 125 MHz)

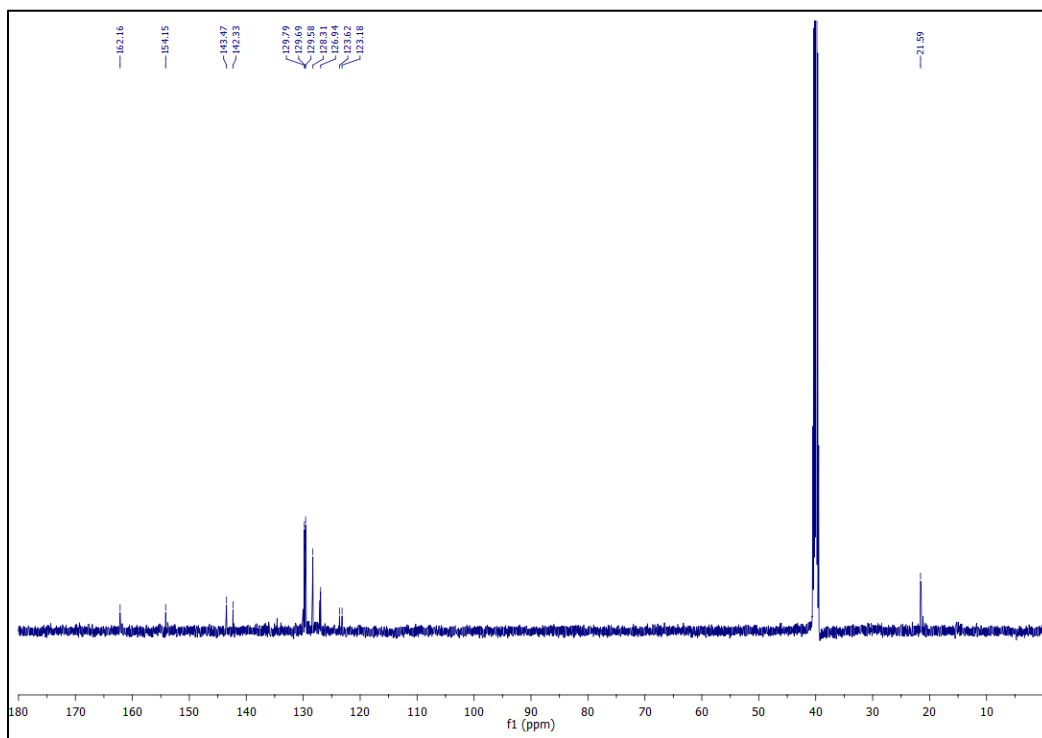

$^1\text{H}$  spectrum 7-chloro-2-(4-chlorophenyl)quinazolin-4(3H)-one (6a10) (DMSO-d6, 500 MHz)

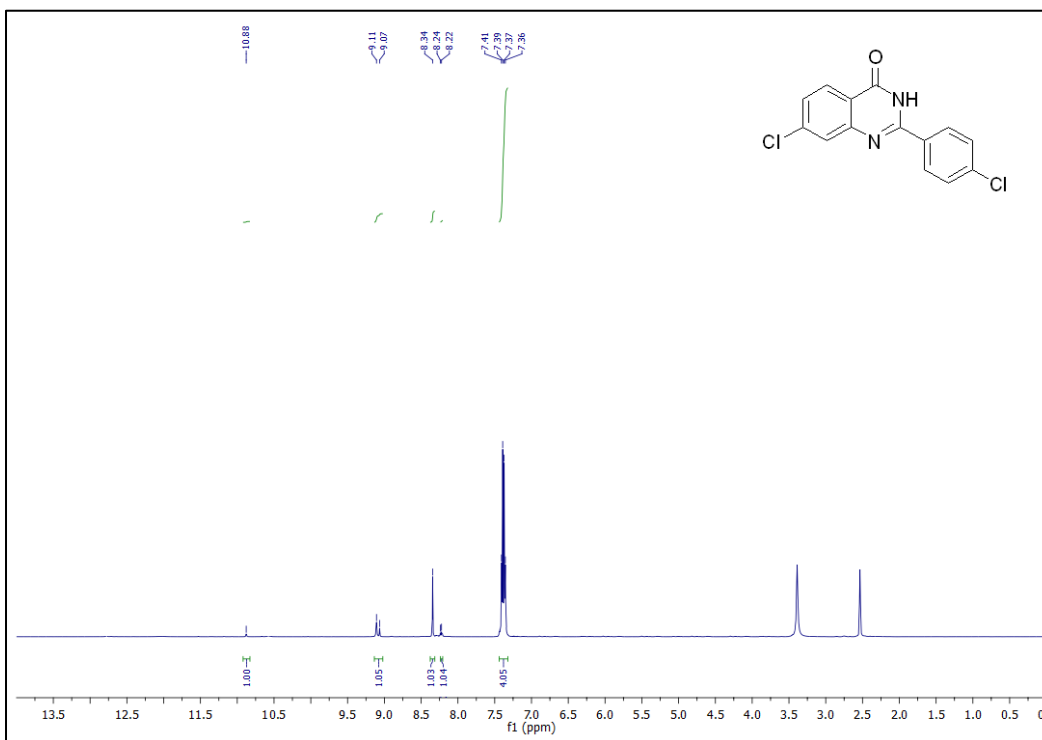

$^{13}\text{C}\{^1\text{H}\}$  spectrum 7-chloro-2-(4-chlorophenyl)quinazolin-4(3H)-one (6a10) (DMSO-d<sub>6</sub>, 125 MHz)

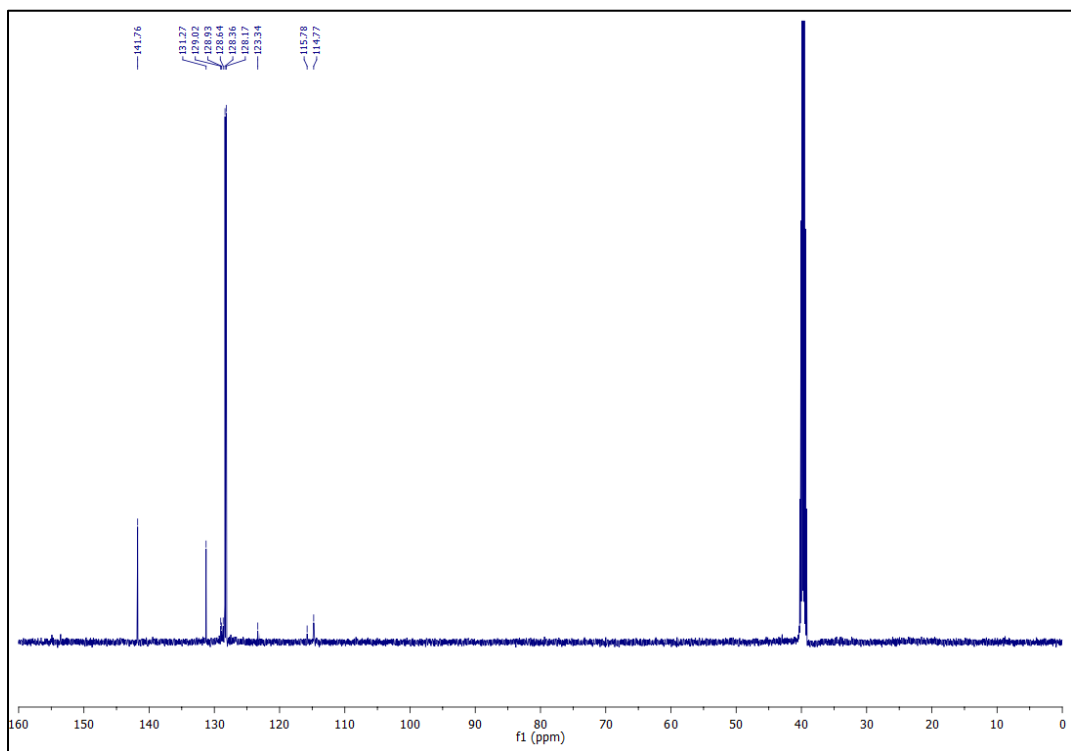

$^1\text{H}$  spectrum 2-(3-methoxyphenyl)quinazolin-4(3H)-one (6a11) (DMSO-d<sub>6</sub>, 500 MHz)

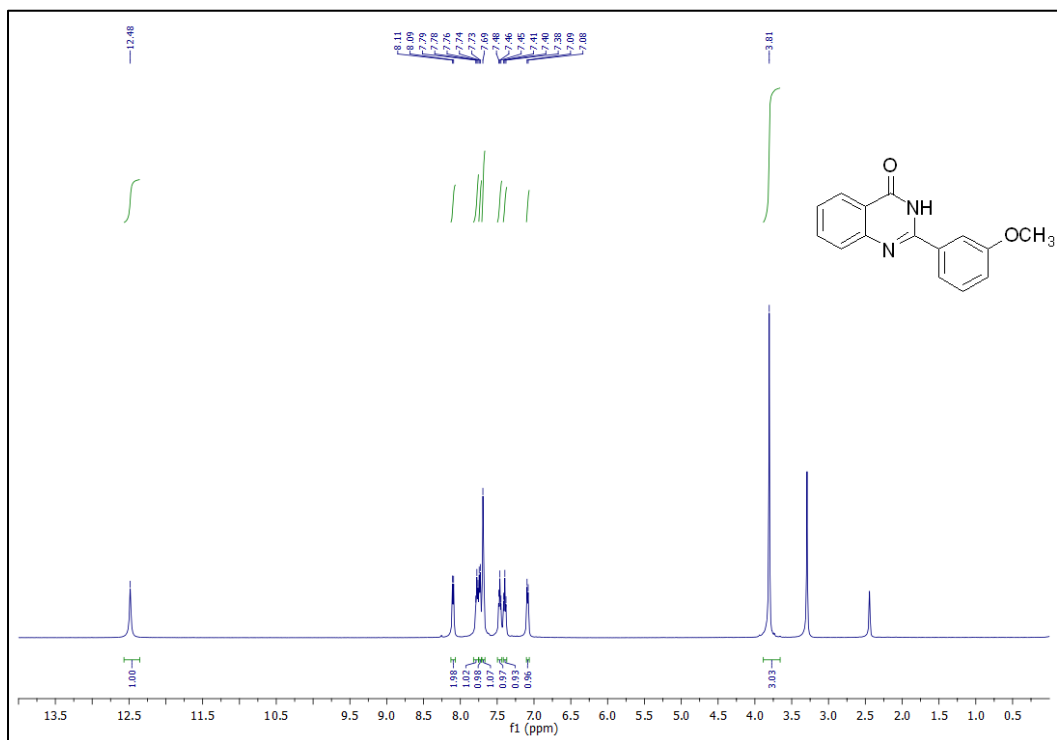

$^{13}\text{C}\{^1\text{H}\}$  spectrum 2-(3-methoxyphenyl)quinazolin-4(3H)-one (6a11) (DMSO-d<sub>6</sub>, 125 MHz)

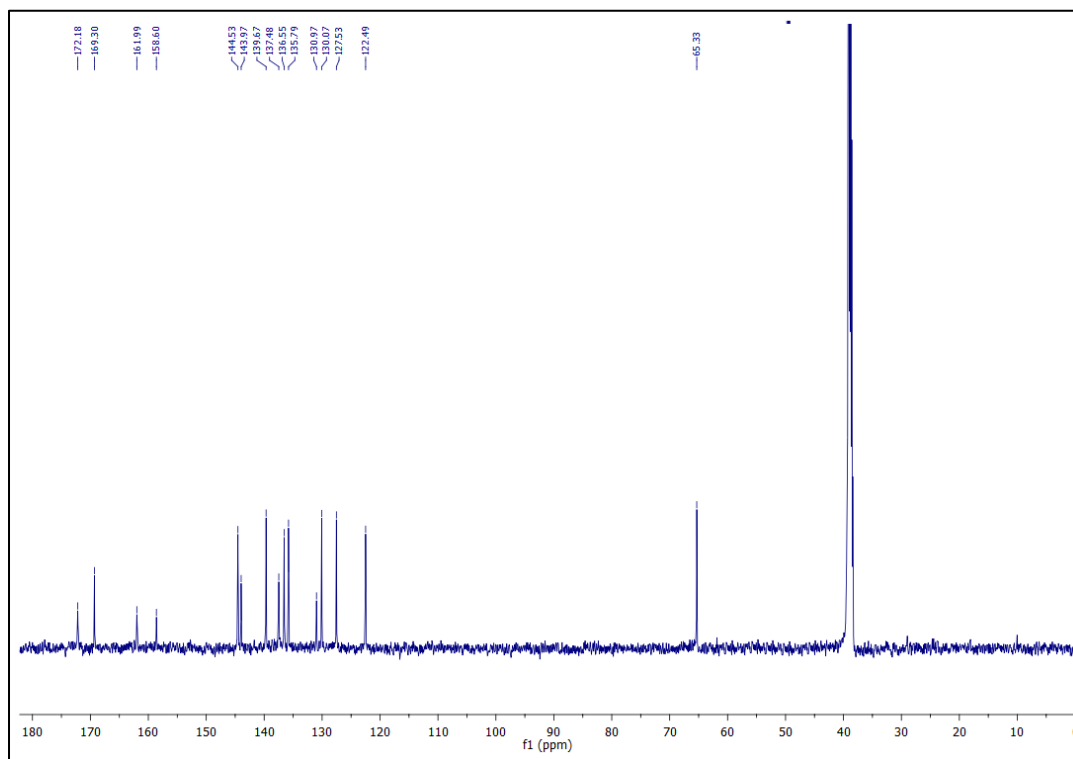

$^1\text{H}$  spectrum 2-(2-bromophenyl)quinazolin-4(3H)-one (6a12) (DMSO-d<sub>6</sub>, 500 MHz)

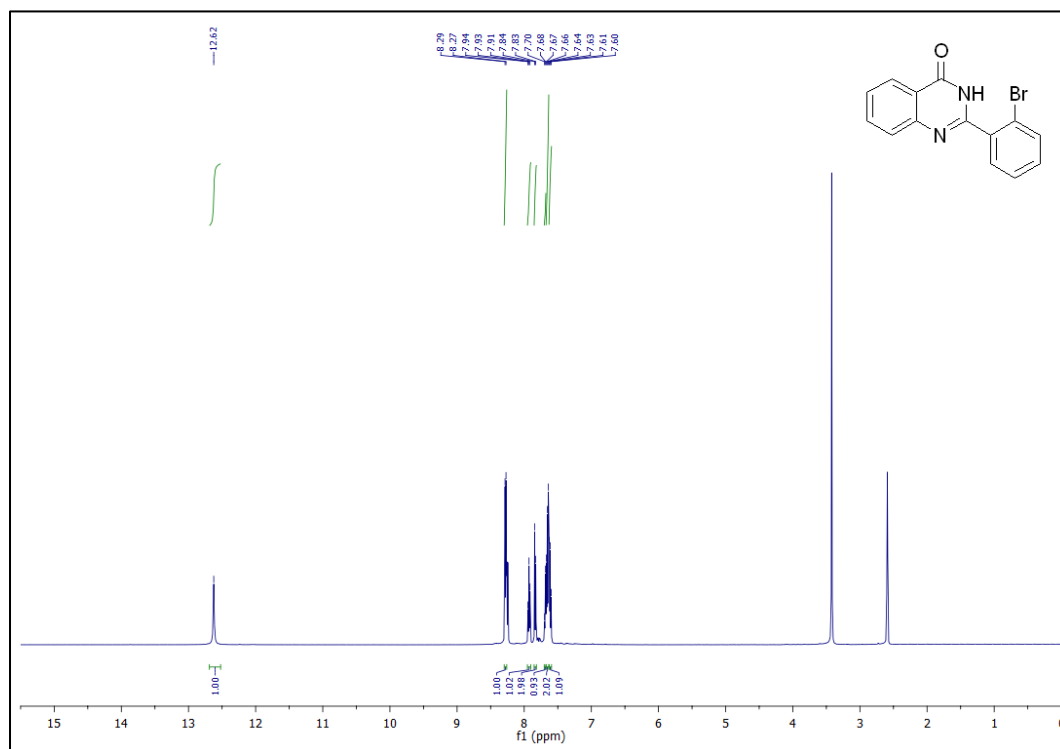

$^{13}\text{C}\{^1\text{H}\}$  spectrum 2-(2-bromophenyl)quinazolin-4(3H)-one (6a12) (DMSO-d<sub>6</sub>, 125 MHz)

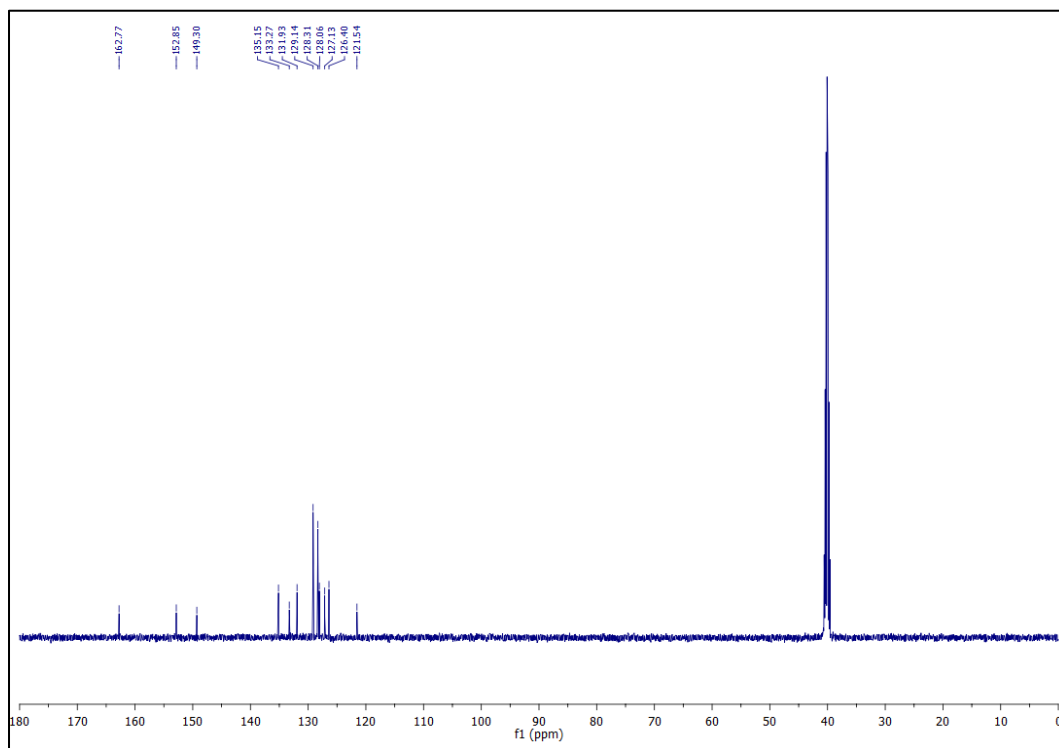

$^1\text{H}$  spectrum (E)-2-styrylquinazolin-4(3H)-one (6a13) (CDCl<sub>3</sub>, 500 MHz)

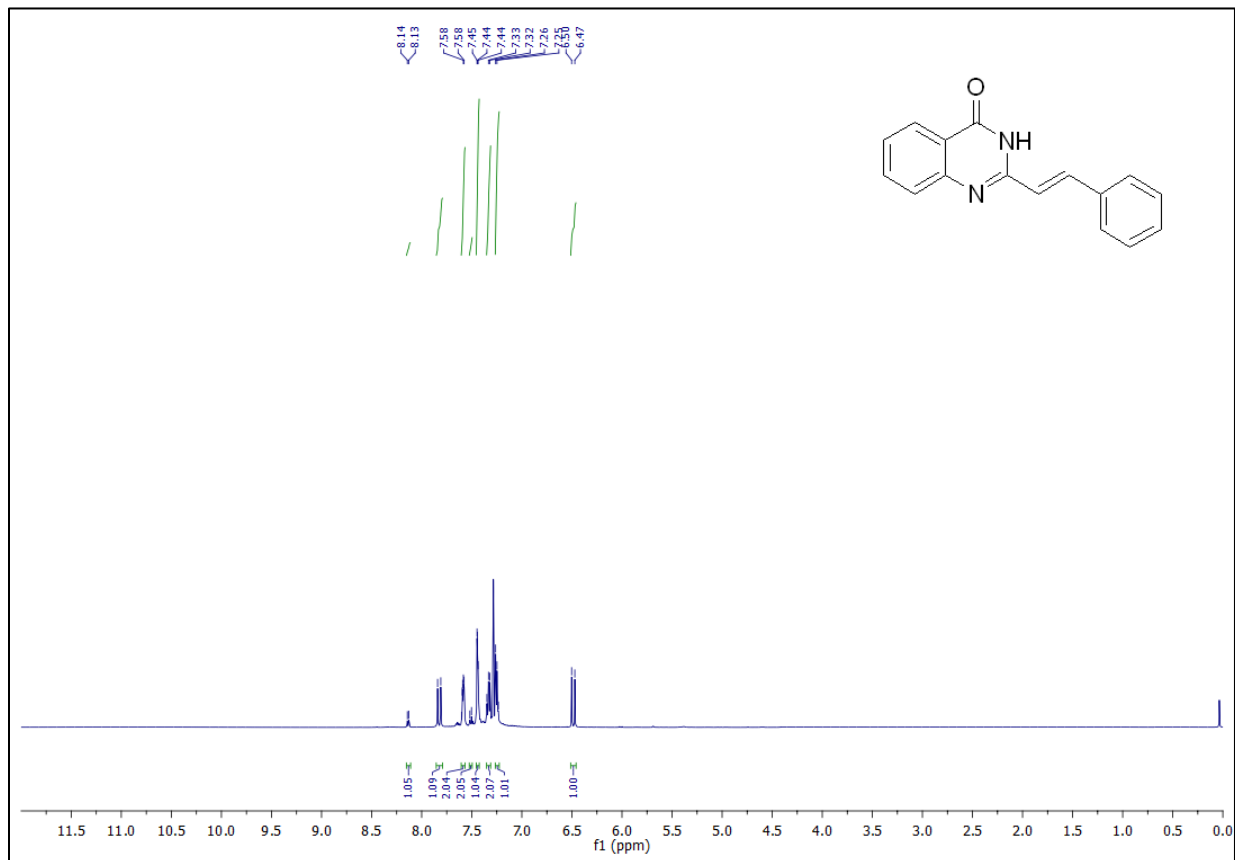

**<sup>1</sup>H spectrum 2-(3-fluorophenyl)quinazolin-4(3H)-one (6a15) (DMSO-d6, 500 MHz)**

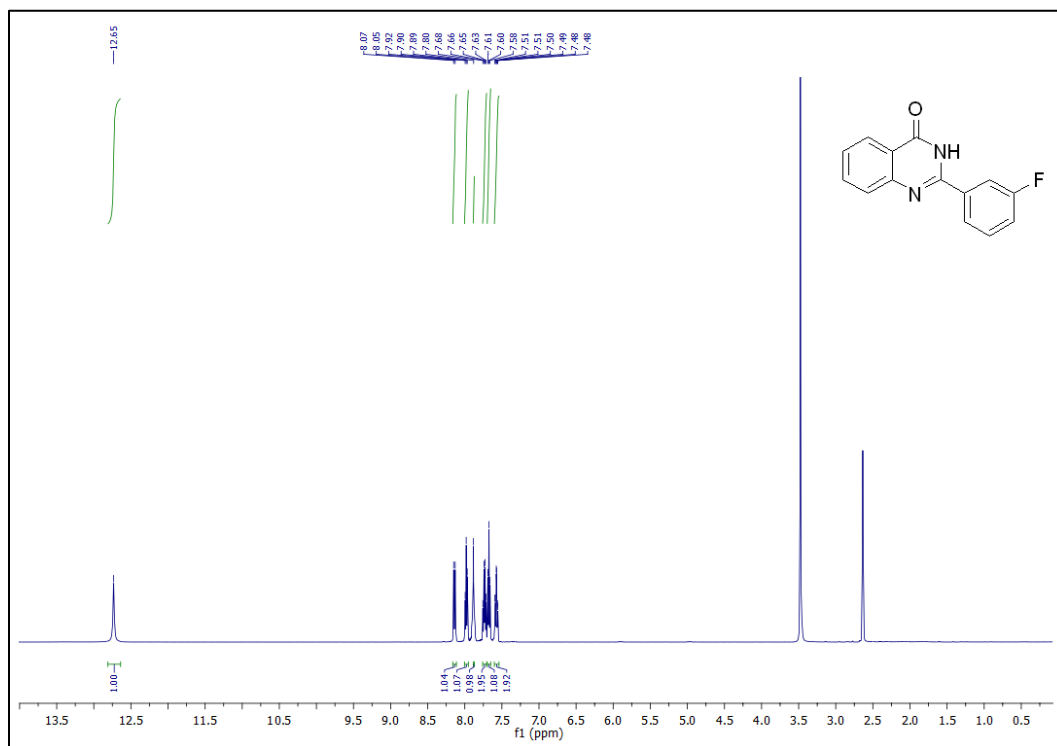

**<sup>13</sup>C{<sup>1</sup>H} spectrum 2-(3-fluorophenyl)quinazolin-4(3H)-one (6a15) (DMSO-d6, 125 MHz)**

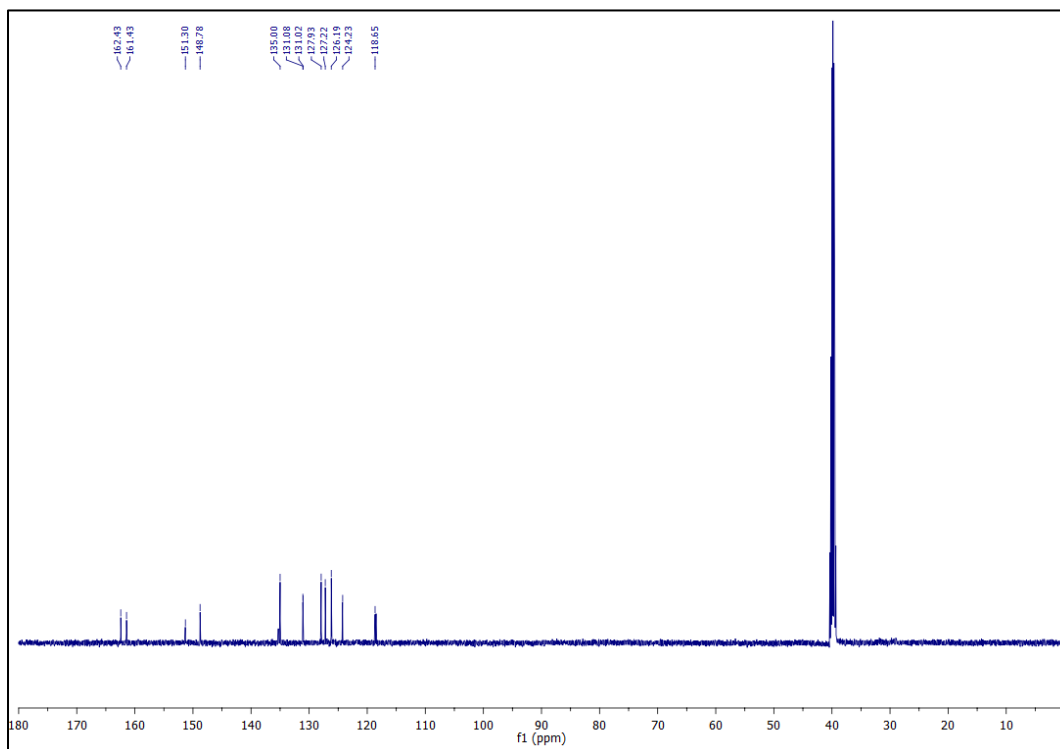

**$^1\text{H}$  spectrum 7-chloro-2-(4-methoxyphenyl)quinazolin-4(3H)-one (6a16) (DMSO- $d_6$ , 500 MHz)**

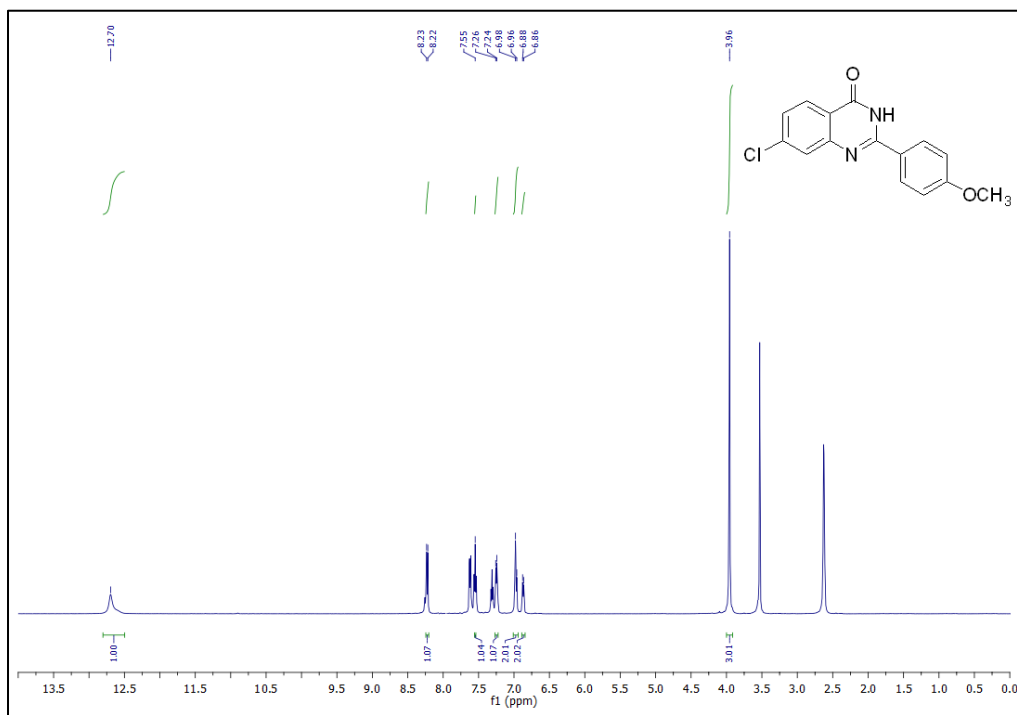

**$^{13}\text{C}\{^1\text{H}\}$  spectrum 7-chloro-2-(4-methoxyphenyl)quinazolin-4(3H)-one (6a16) (DMSO- $d_6$ , 125 MHz)**

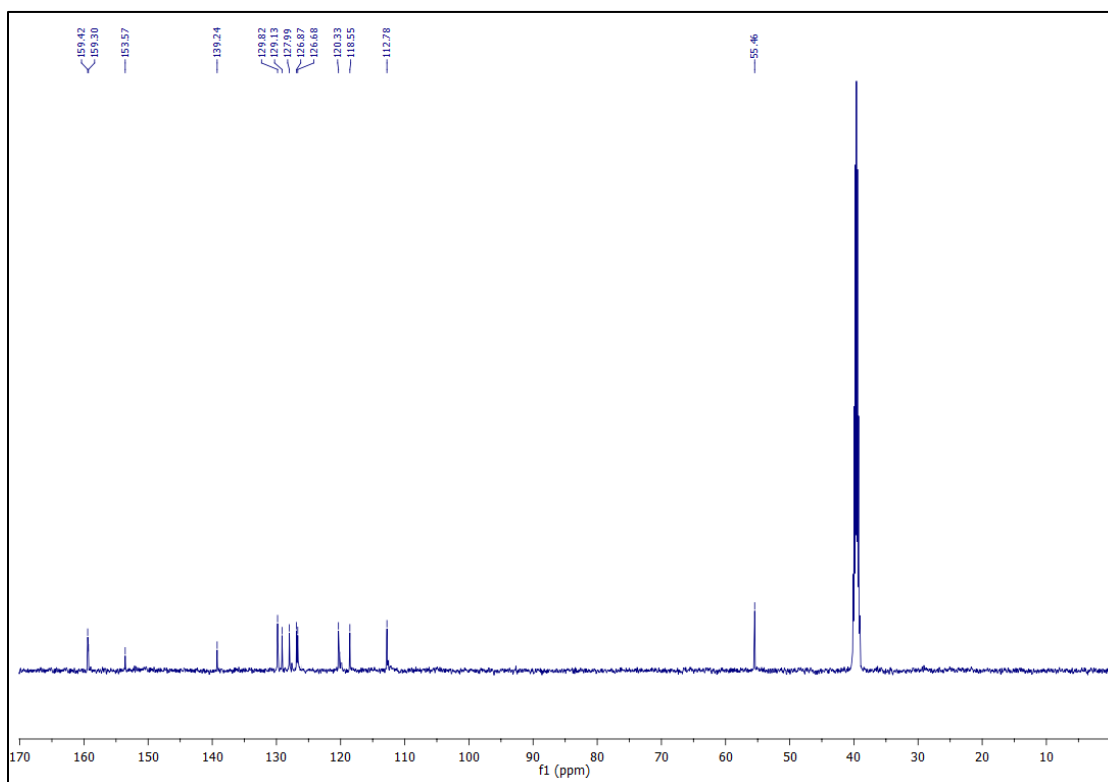

**$^1\text{H}$  spectrum 2-(2-bromophenyl)-7-chloroquinazolin-4(3H)-one (6a17) (DMSO-d<sub>6</sub>, 500 MHz)**

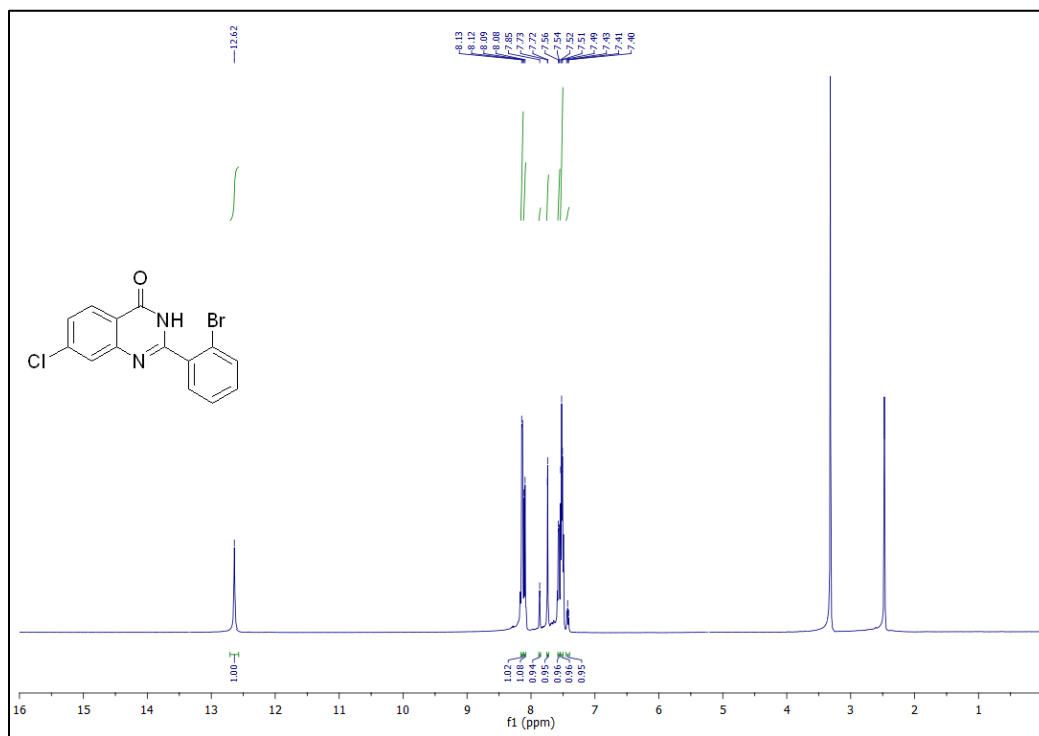

**$^{13}\text{C}\{^1\text{H}\}$  spectrum 2-(2-bromophenyl)-7-chloroquinazolin-4(3H)-one (6a17) (DMSO-d<sub>6</sub>, 125 MHz)**

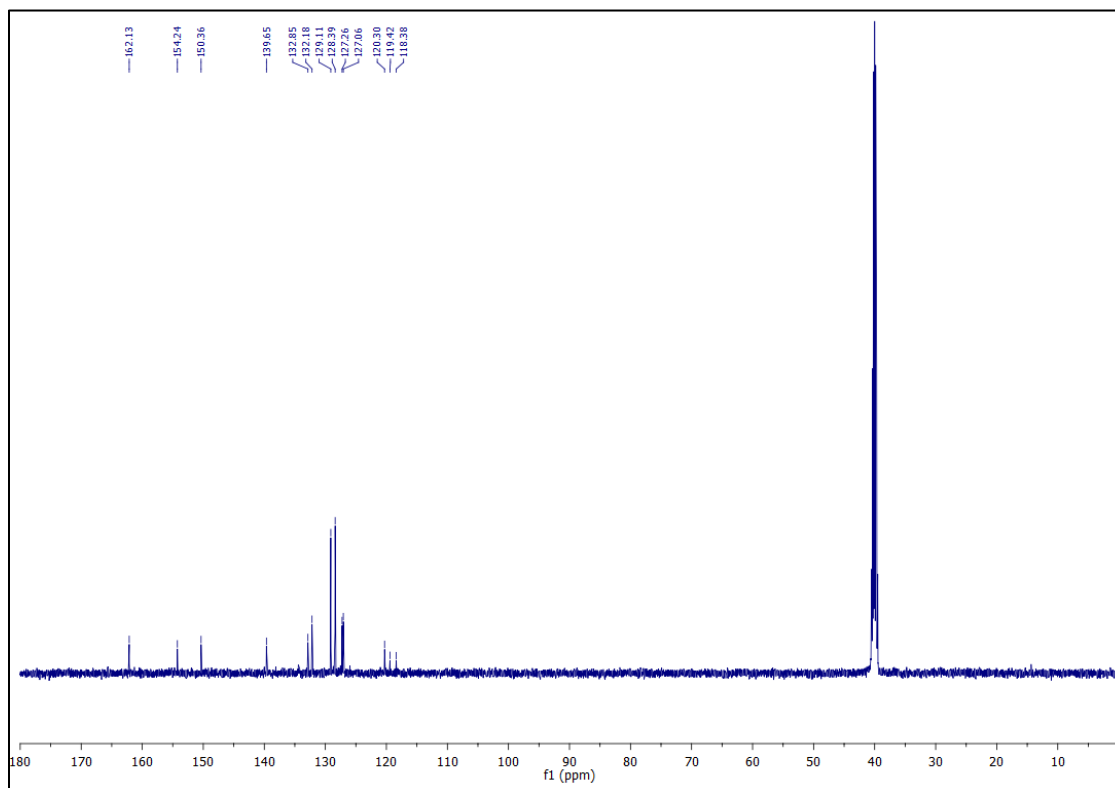

**<sup>1</sup>H spectrum 7-chloro-2-(4-fluorophenyl)quinazolin-4(3H)-one (6a18) (DMSO-d<sub>6</sub>, 500 MHz)**

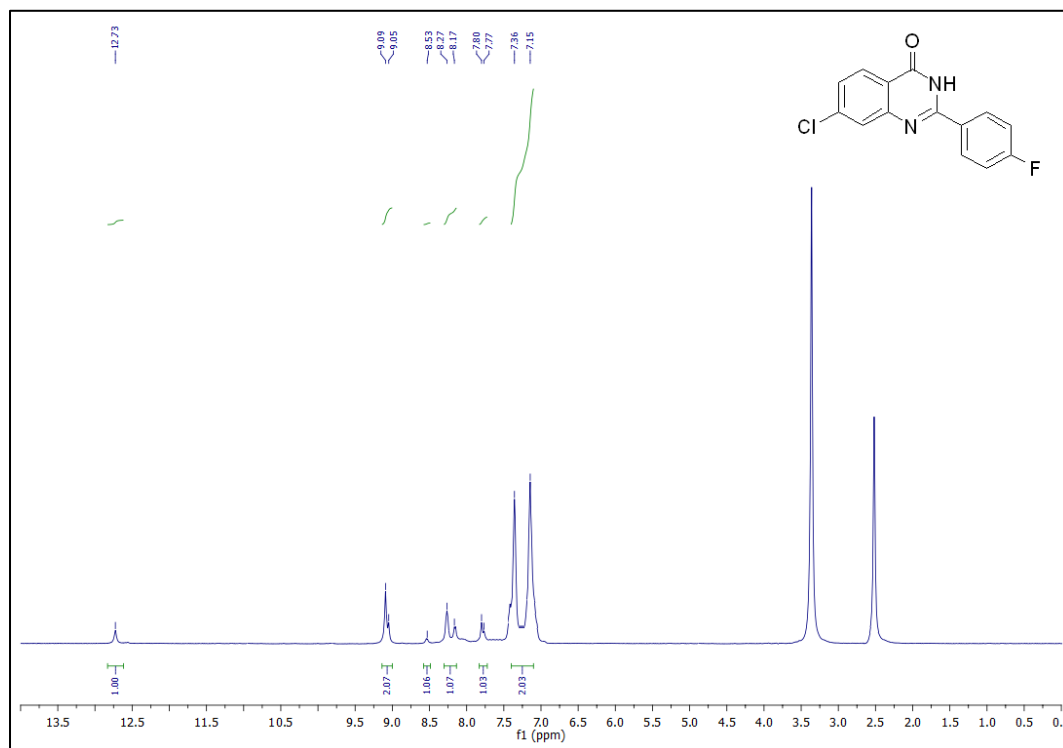

**<sup>13</sup>C{<sup>1</sup>H} spectrum 7-chloro-2-(4-fluorophenyl)quinazolin-4(3H)-one (6a18) (DMSO-d<sub>6</sub>, 125 MHz)**

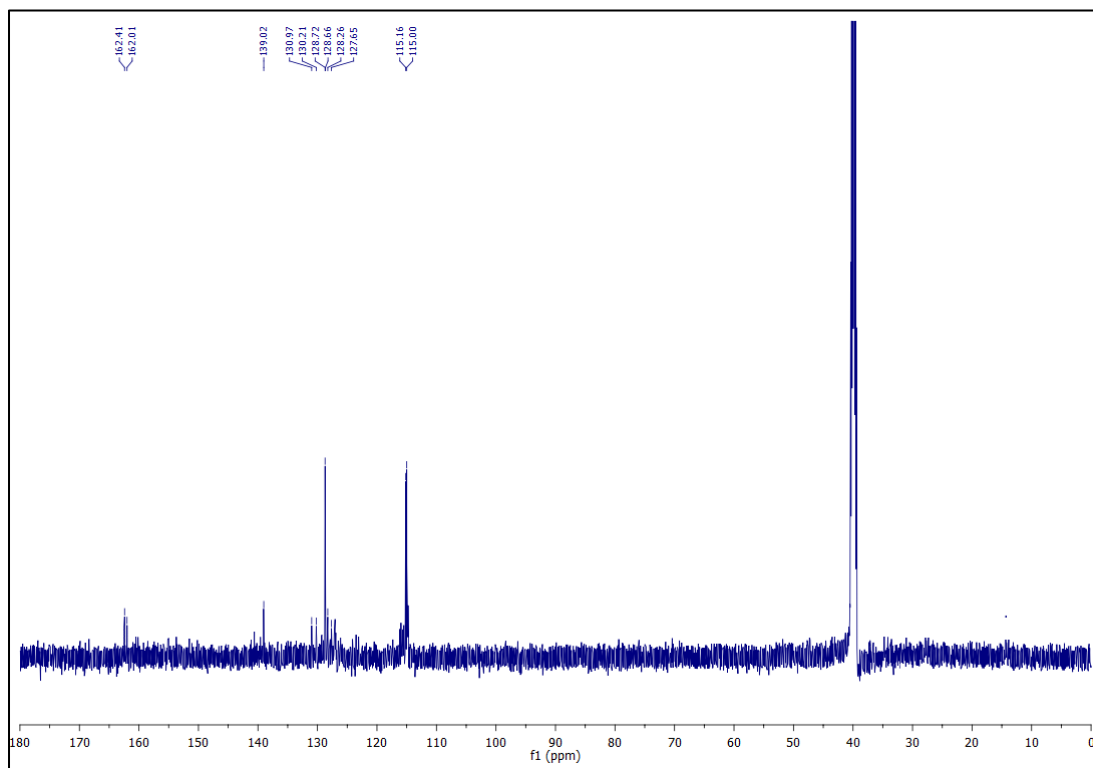



**$^1\text{H}$  spectrum 7-chloro-2-(2,4-dichlorophenyl)quinazolin-4(3H)-one (6a19) (DMSO-d<sub>6</sub>, 500 MHz)**

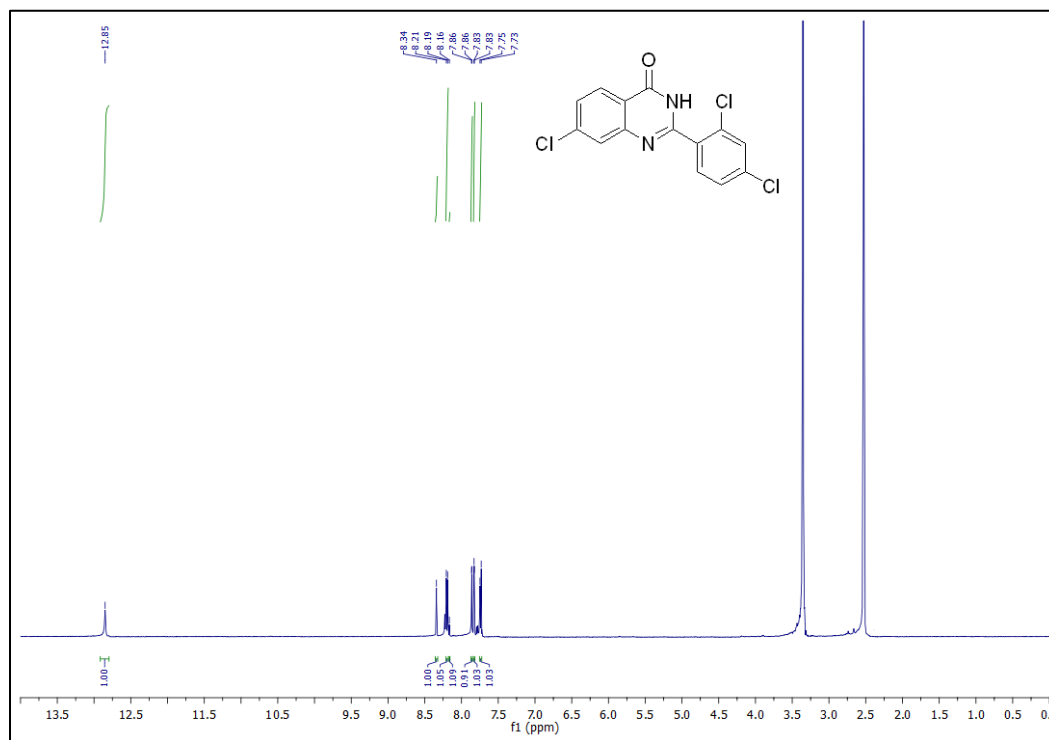

**$^{13}\text{C}\{^1\text{H}\}$  spectrum 7-chloro-2-(2,4-dichlorophenyl)quinazolin-4(3H)-one (6a19) (DMSO-d<sub>6</sub>, 125 MHz)**

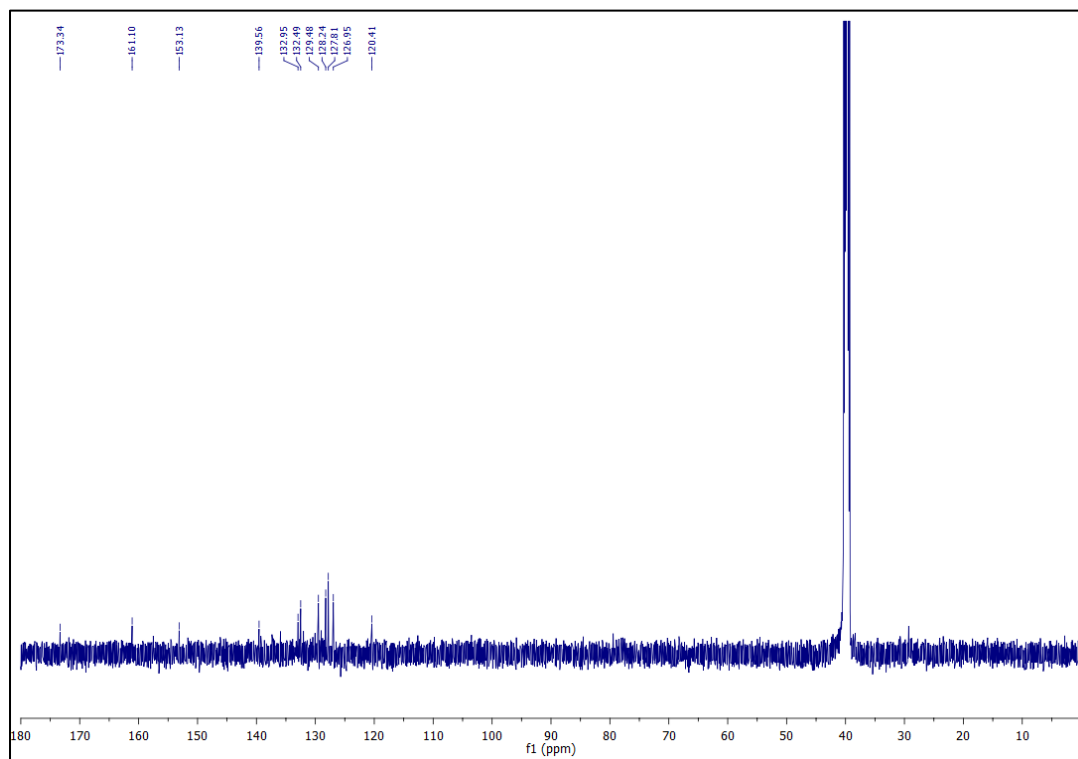

**<sup>1</sup>H spectrum 2-(2,4-dichlorophenyl)quinazolin-4(3H)-one (6a20) (DMSO-d6, 500 MHz)**

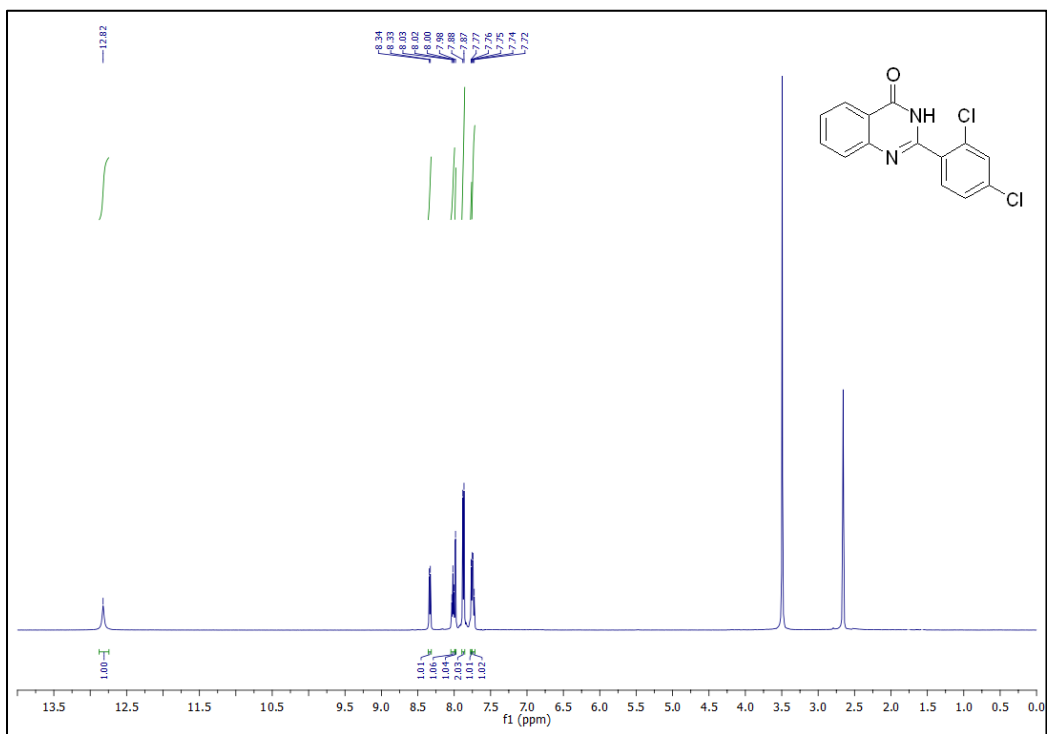

**<sup>13</sup>C{<sup>1</sup>H} spectrum 2-(2,4-dichlorophenyl)quinazolin-4(3H)-one (6a20) (DMSO-d6, 125 MHz)**

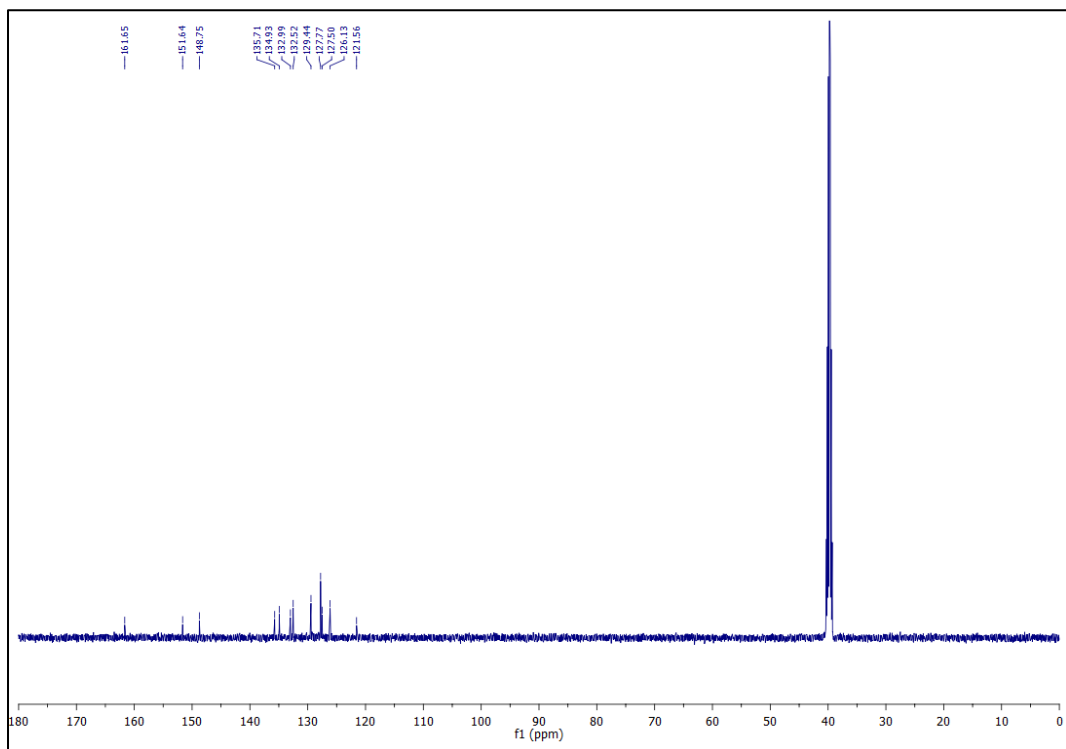

**<sup>1</sup>H spectrum 2-octylquinazolin-4(3H)-one (6a22) (DMSO-d<sub>6</sub>, 500 MHz)**

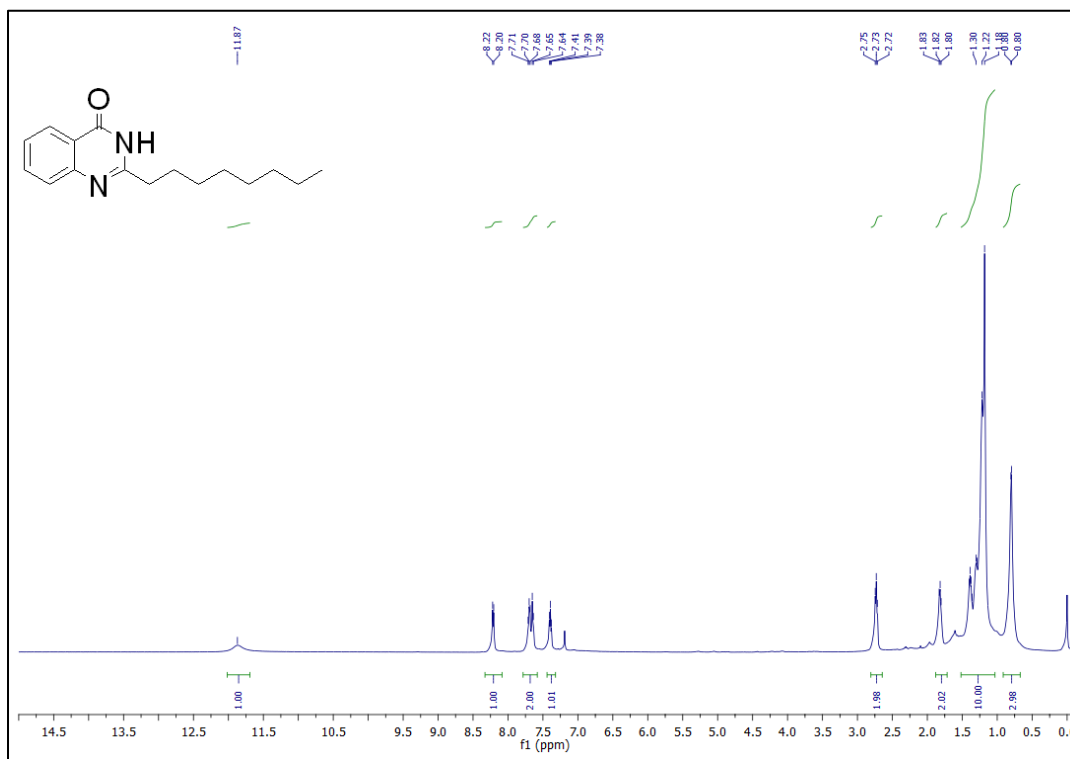

**<sup>13</sup>C{<sup>1</sup>H} spectrum 2-octylquinazolin-4(3H)-one (6a22) (DMSO-d<sub>6</sub>, 125 MHz)**

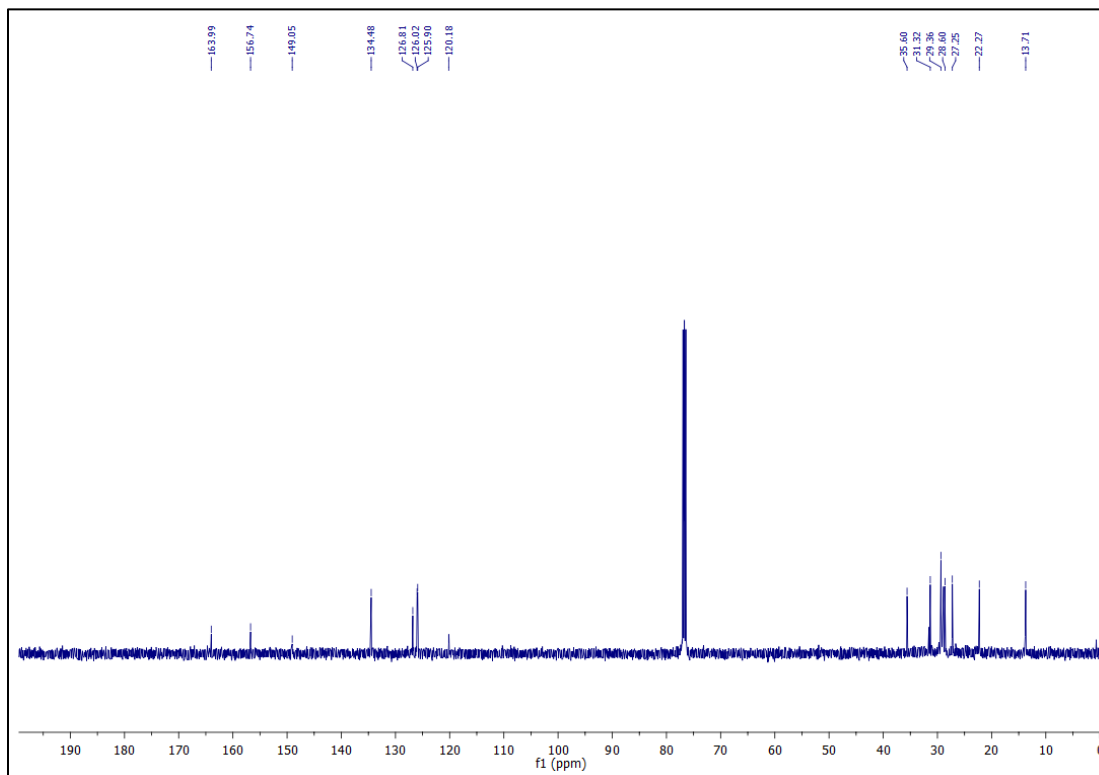

**$^1\text{H}$  spectrum 2-(p-tolyl)quinazoline (12a1) ( $\text{CDCl}_3$ , 400 MHz)**

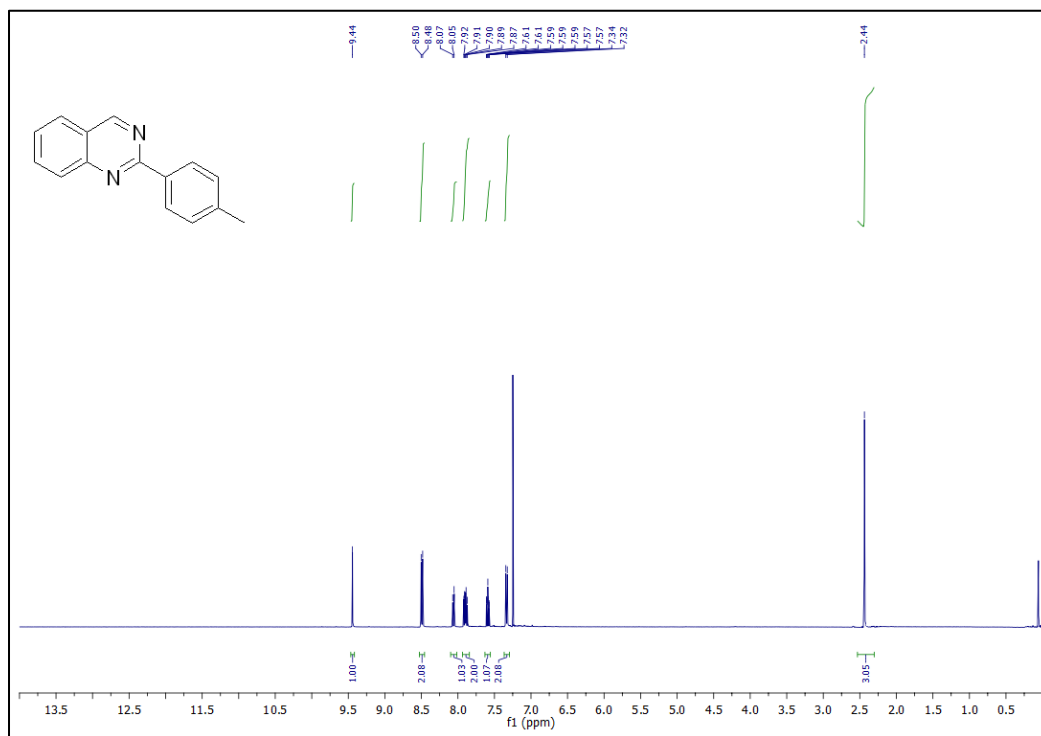

**$^{13}\text{C}\{^1\text{H}\}$  spectrum 2-(p-tolyl)quinazoline (12a1) ( $\text{CDCl}_3$ , 100 MHz)**

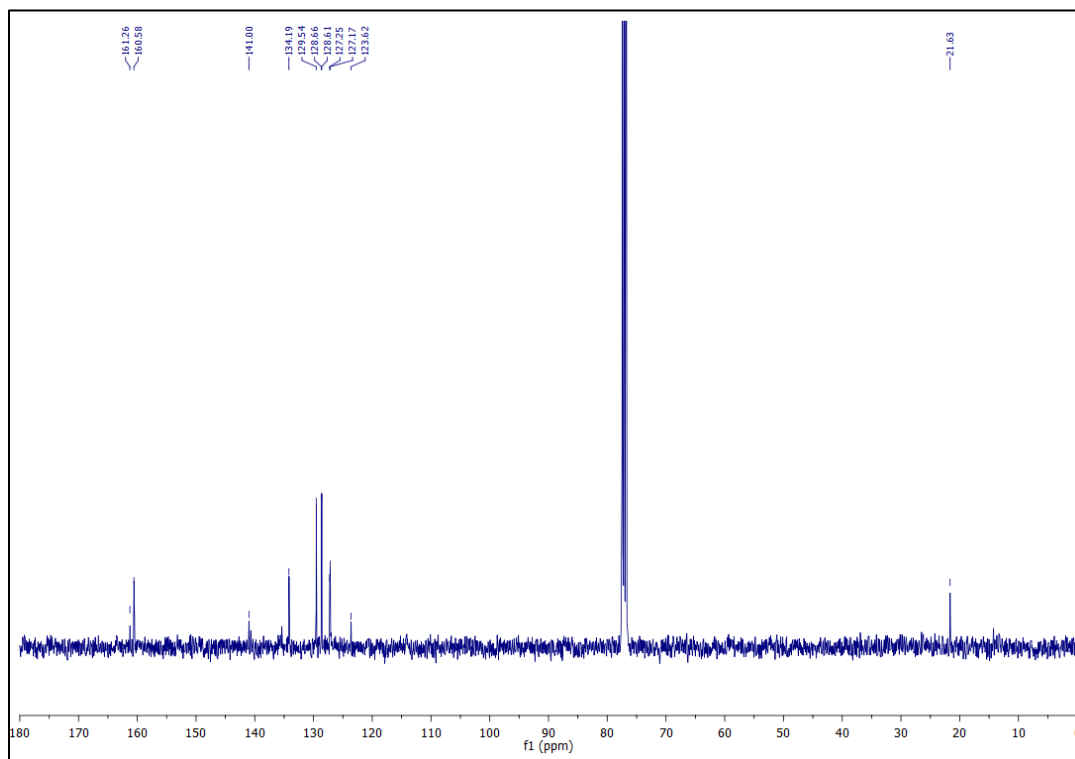

**$^1\text{H}$  spectrum 2-phenylquinazoline (12a2) ( $\text{CDCl}_3$ , 400 MHz)**

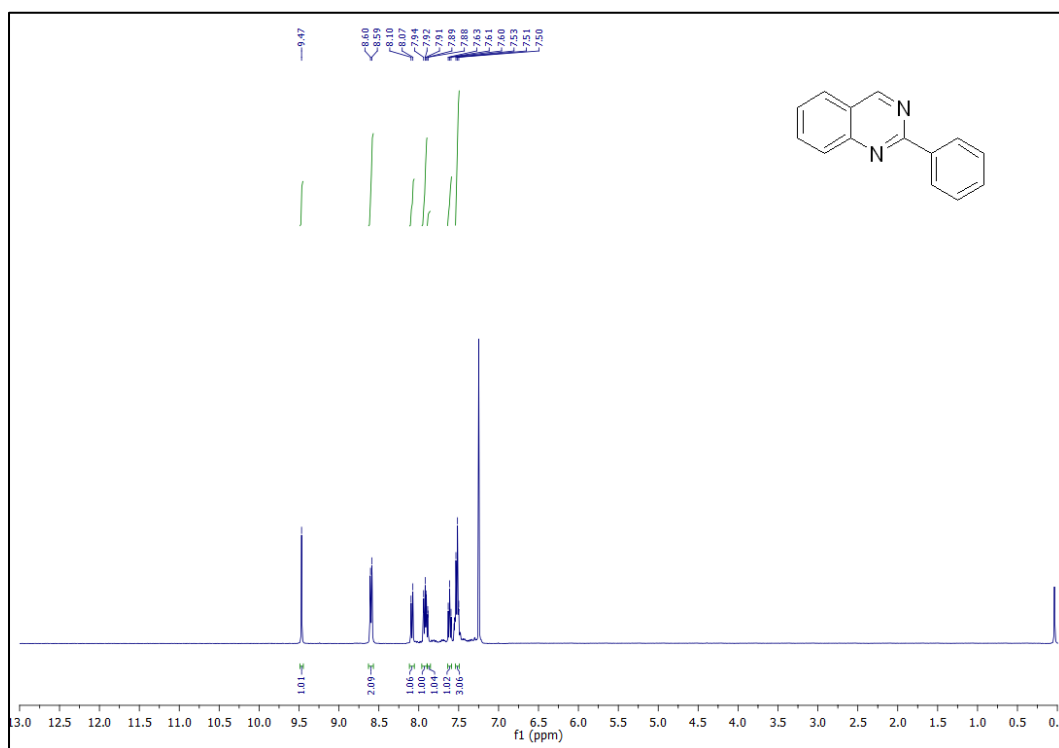

**$^{13}\text{C}\{^1\text{H}\}$  spectrum 2-phenylquinazoline (12a2) ( $\text{CDCl}_3$ , 100 MHz)**

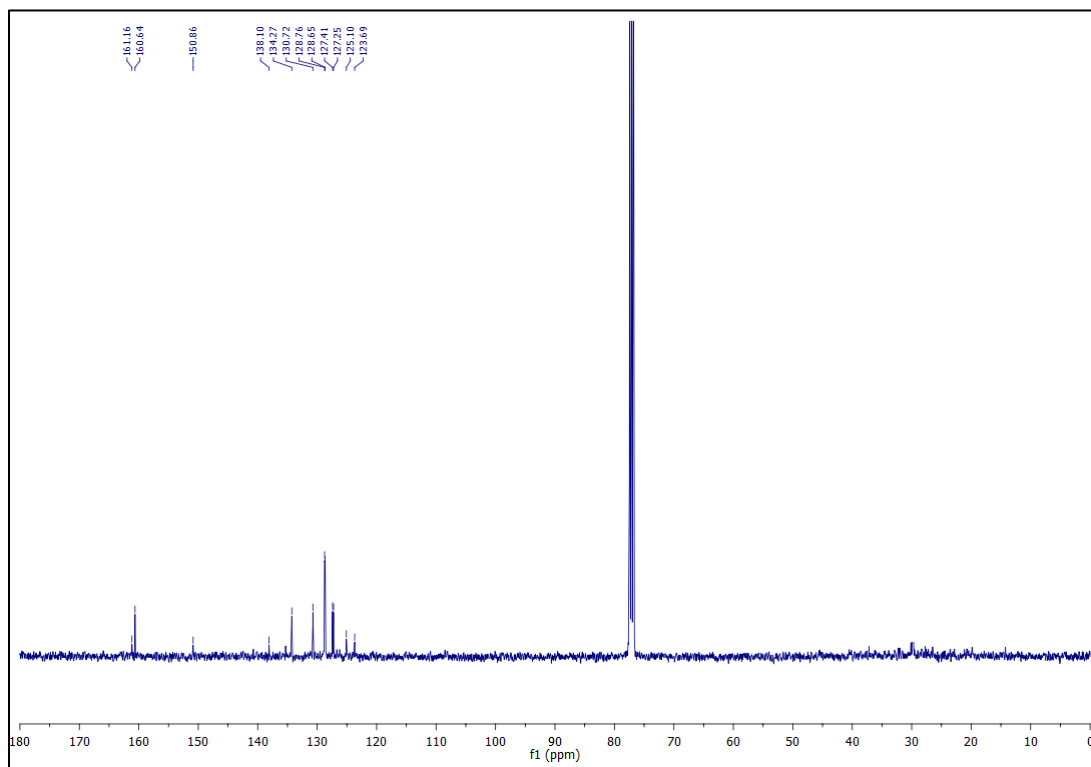

**<sup>1</sup>H spectrum 4-(quinazolin-2-yl)benzonitrile(12a3) (CDCl<sub>3</sub>, 500 MHz)**

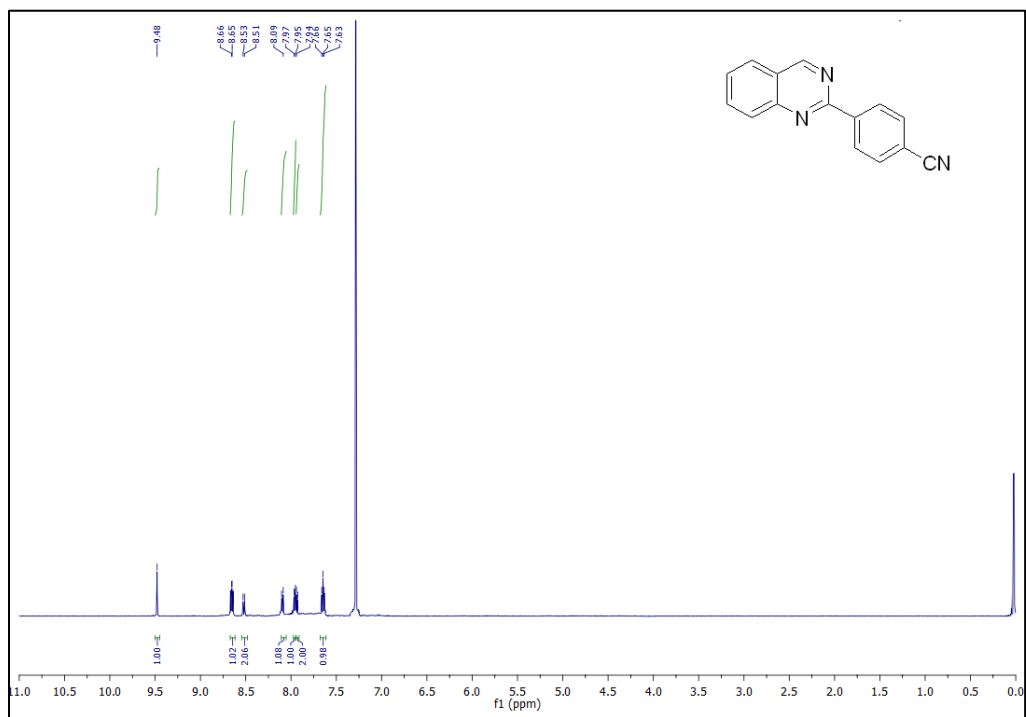

**<sup>1</sup>H spectrum 2-(4-fluorophenyl)quinazoline (12a4) (CDCl<sub>3</sub>, 500 MHz)**

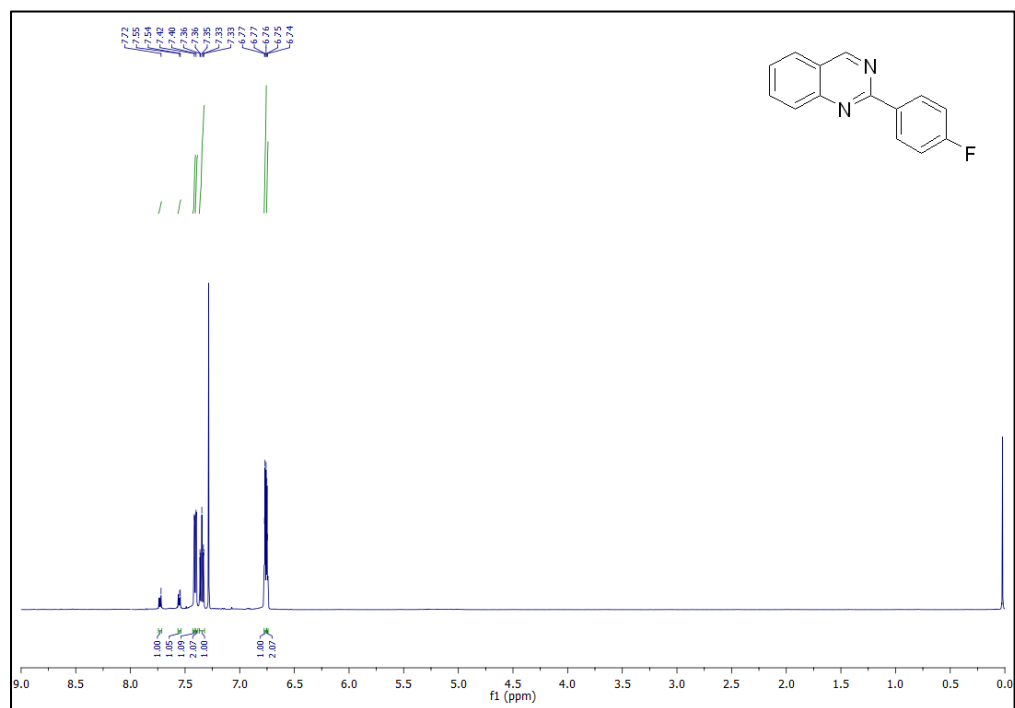

$^{13}\text{C}\{^1\text{H}\}$  spectrum 2-(4-fluorophenyl)quinazoline (12a4) ( $\text{CDCl}_3$ , 125 MHz)

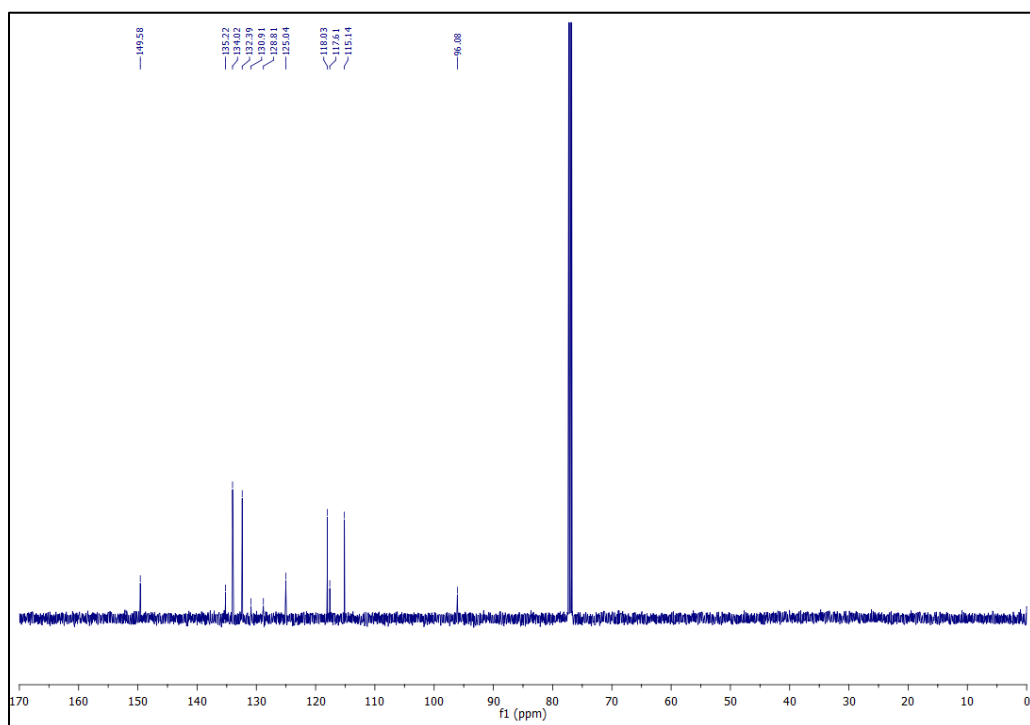

$^1\text{H}$  spectrum 2-(thiophen-2-yl)quinazoline (12a7) ( $\text{CDCl}_3$ , 500 MHz)

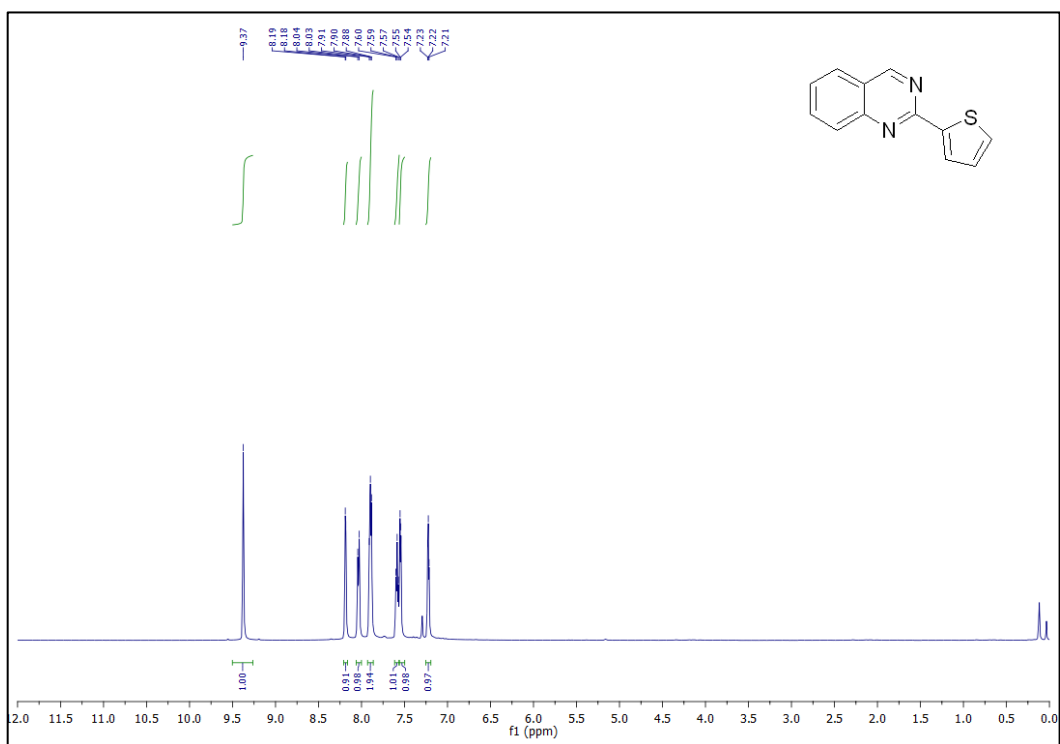

**<sup>13</sup>C spectrum 2-(thiophen-2-yl)quinazoline (12a7) (CDCl<sub>3</sub>, 125 MHz)**

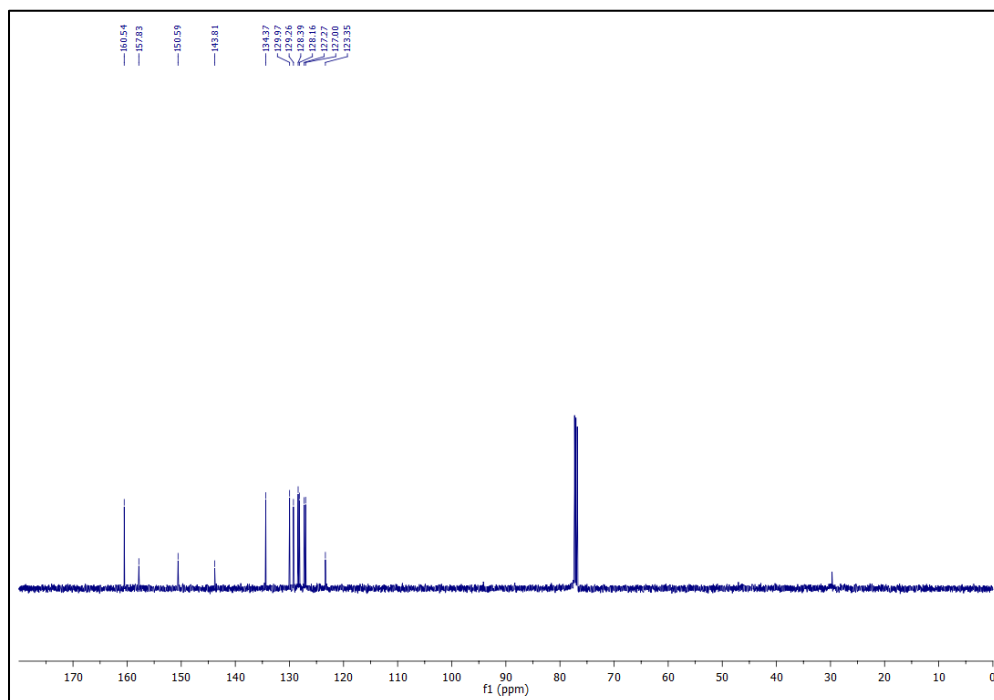

**<sup>1</sup>H spectrum 2-(4-Bromophenyl)quinazoline (12a8) (CDCl<sub>3</sub>, 500 MHz)**

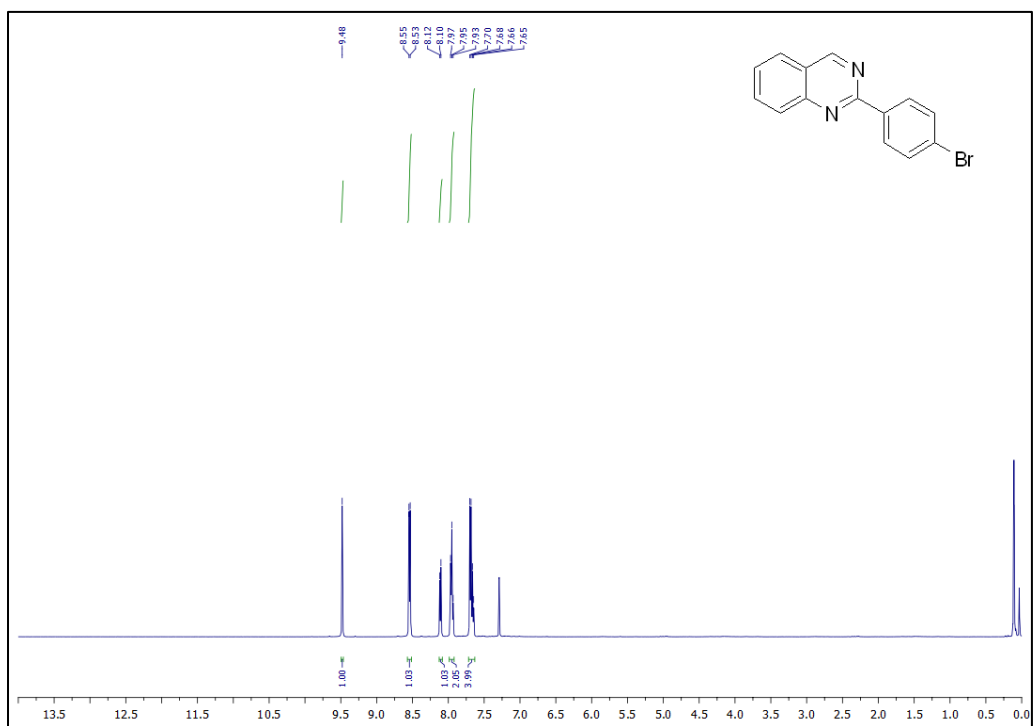



**$^{13}\text{C}$  spectrum 2-(4-Bromophenyl)quinazoline (12a8) ( $\text{CDCl}_3$ , 125 MHz)**

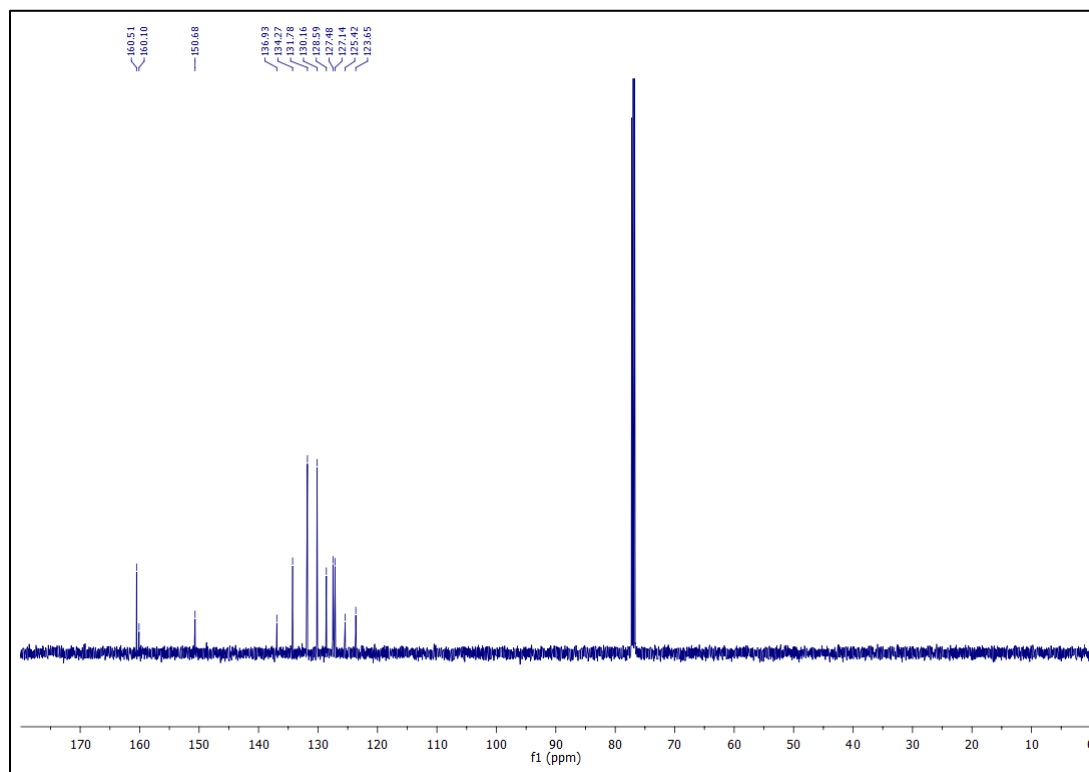

## References

1. SAINT Plus (v 6.14) Bruker AXS Inc., Madison, WI, 2008.
2. Bruker AXS Inc., Madison, WI, 2008.
3. G. M. Sheldrick, SHELXS and SHELXL97 Programs for structure refinement and solution, Göttingen, Germany, 1997.
4. L. Spek, PLATON, A Multipurpose Crystallographic Tool Utrecht University, Utrecht, Netherland, 2002.
5. L. Spek, *J. Appl. Cryst.*, 2003, 36, 7–13.
